# Supplementary material for: Transcription facilitates sister chromatid cohesion on chromosomal arms
Source: PubMed Central journal article supplement (PMC5001582; doi:10.1093/nar/gkw252), 2016-04-15

A

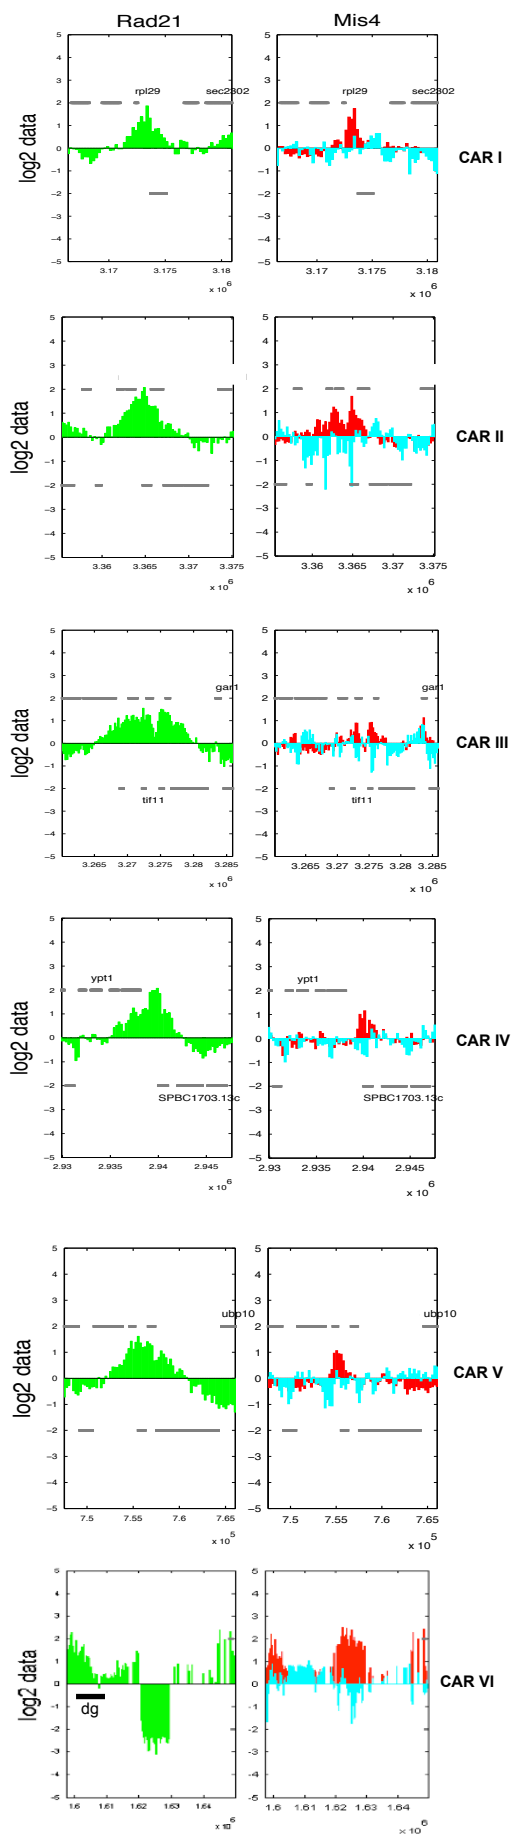Mis4<sup>+</sup>/Rad21<sup>+</sup>

B

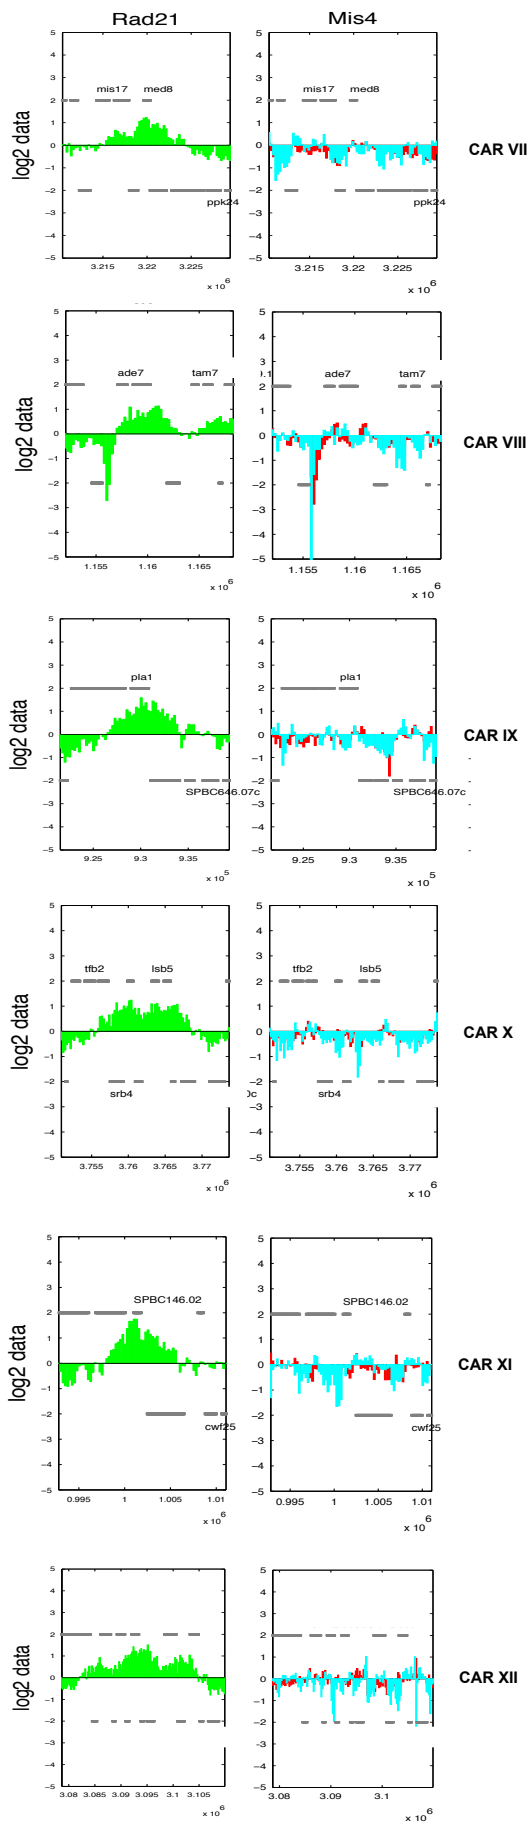Rad21<sup>+</sup>

Mis4+/Rad21+

A

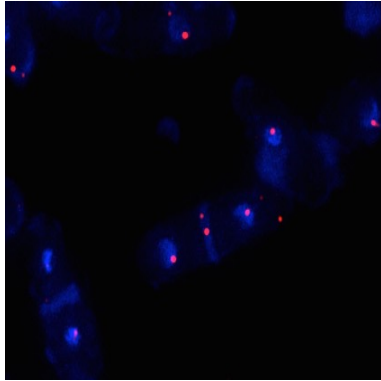

CAR IV

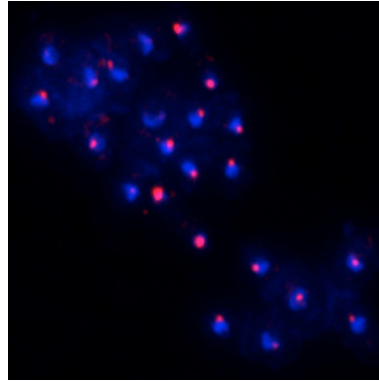

CAR VI

Rad21+

B

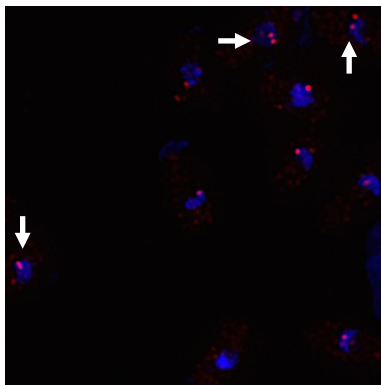

CAR VII

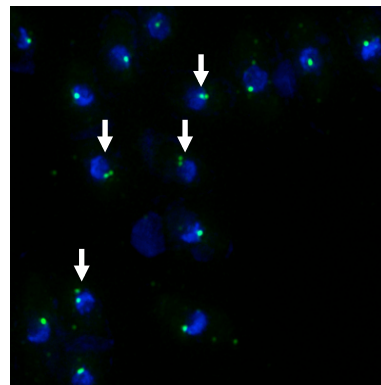

CAR VIII

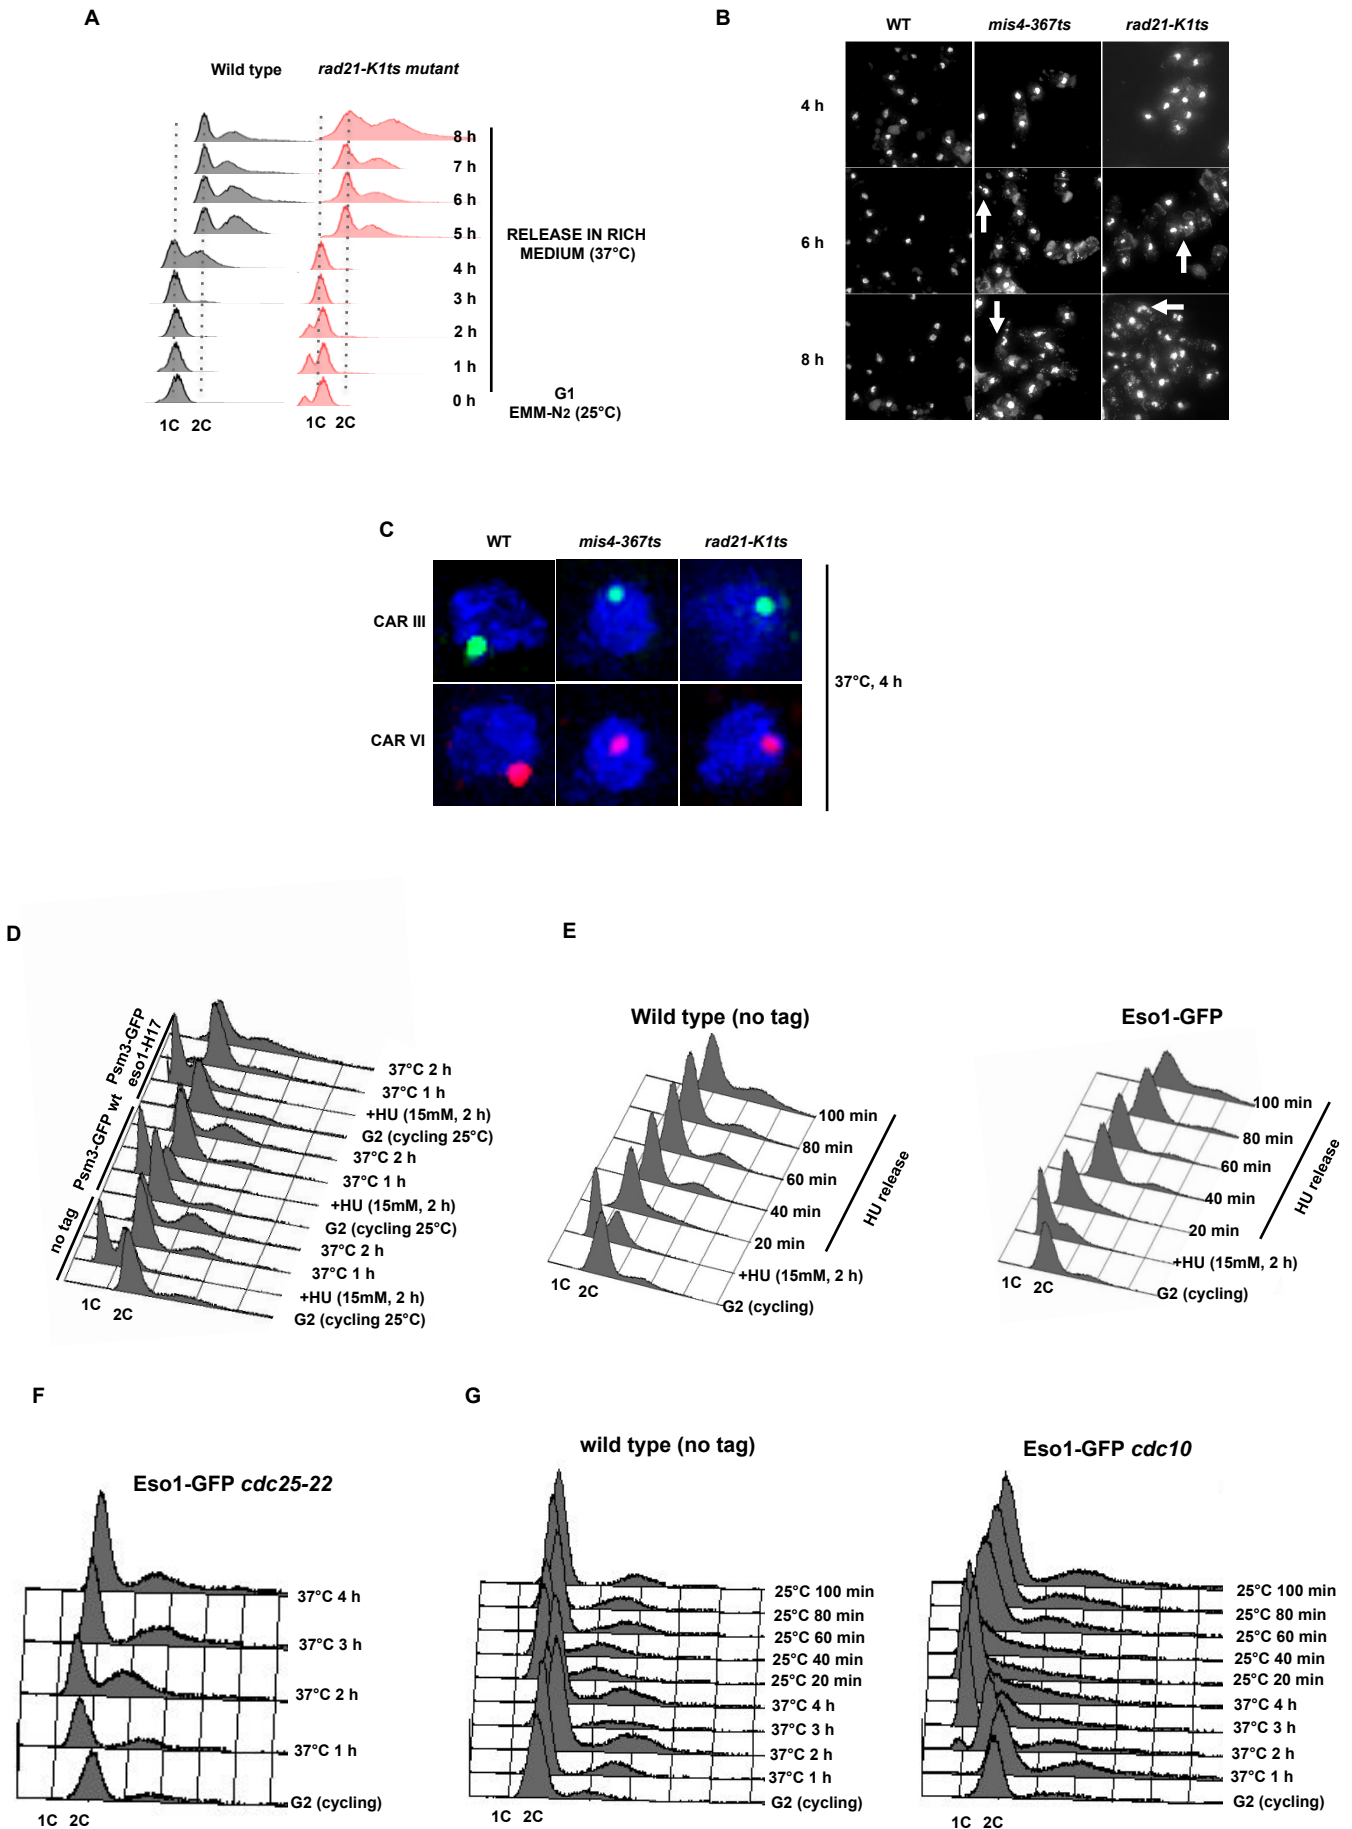

A

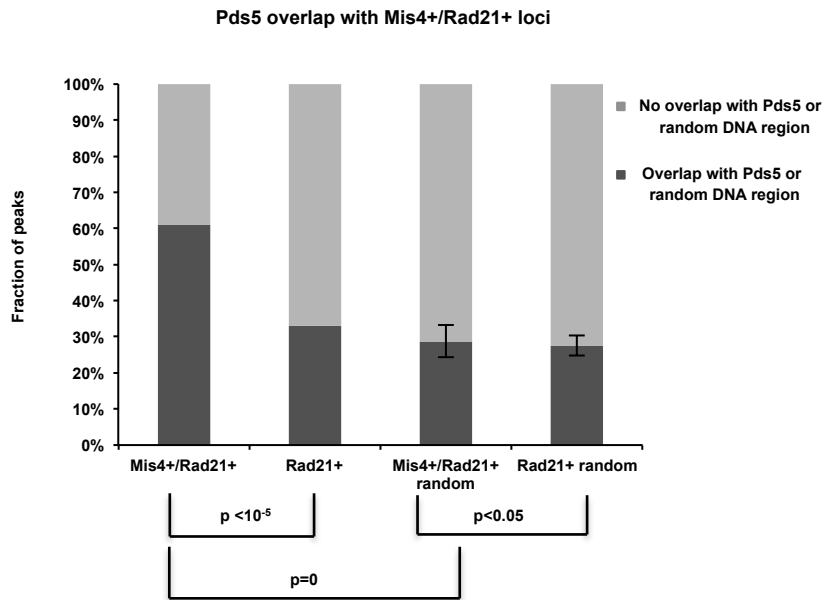

B

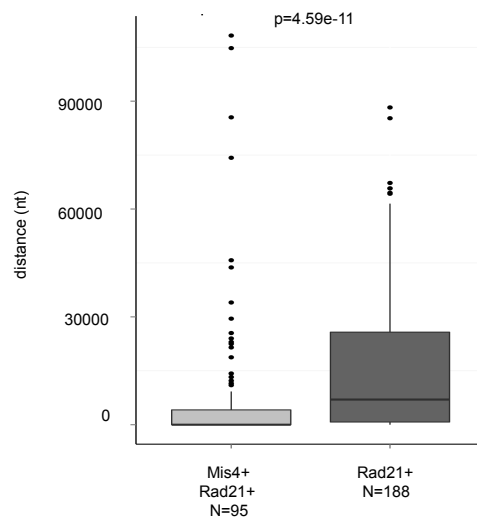

C

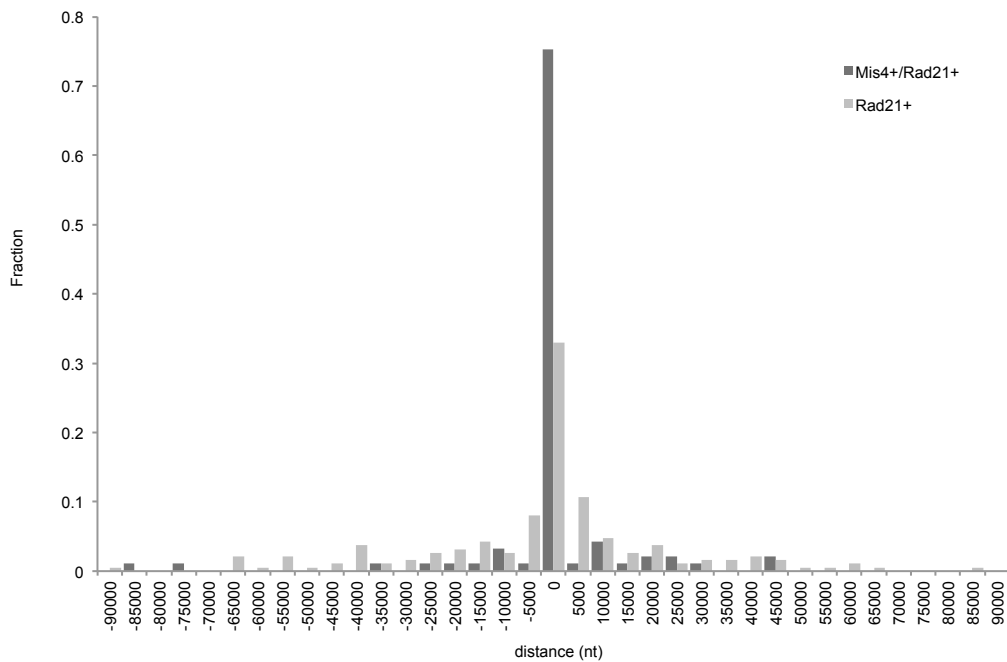

**A**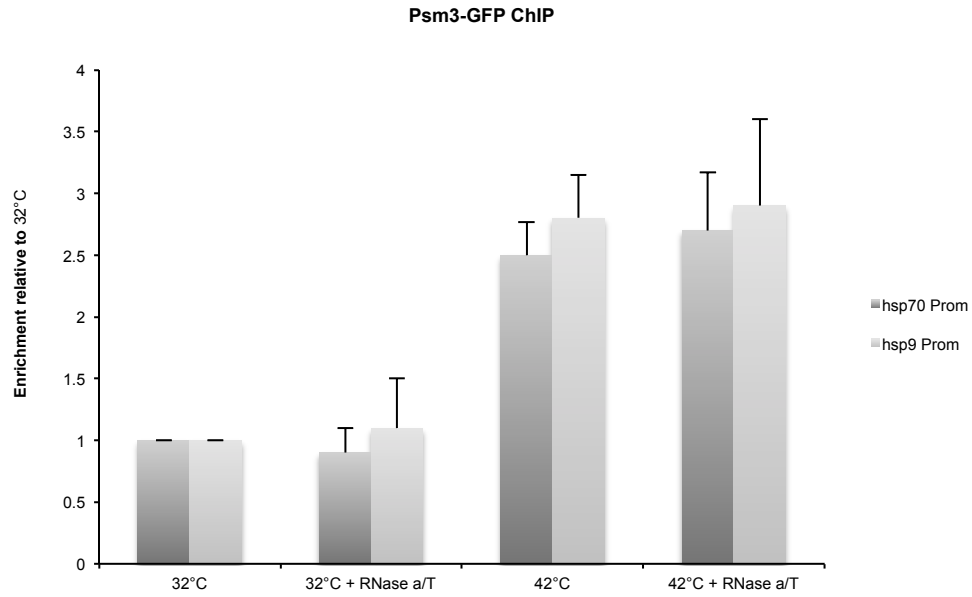**B**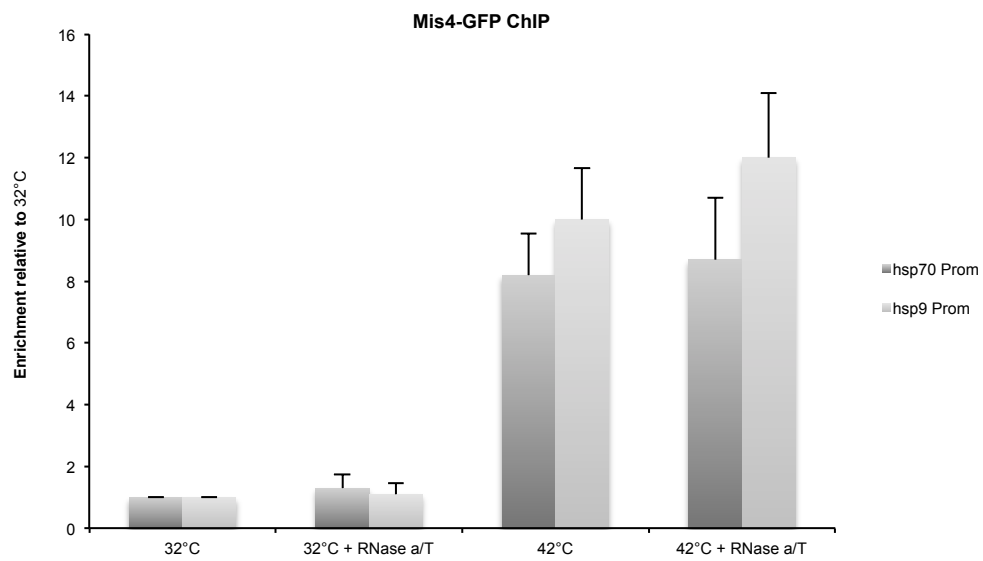

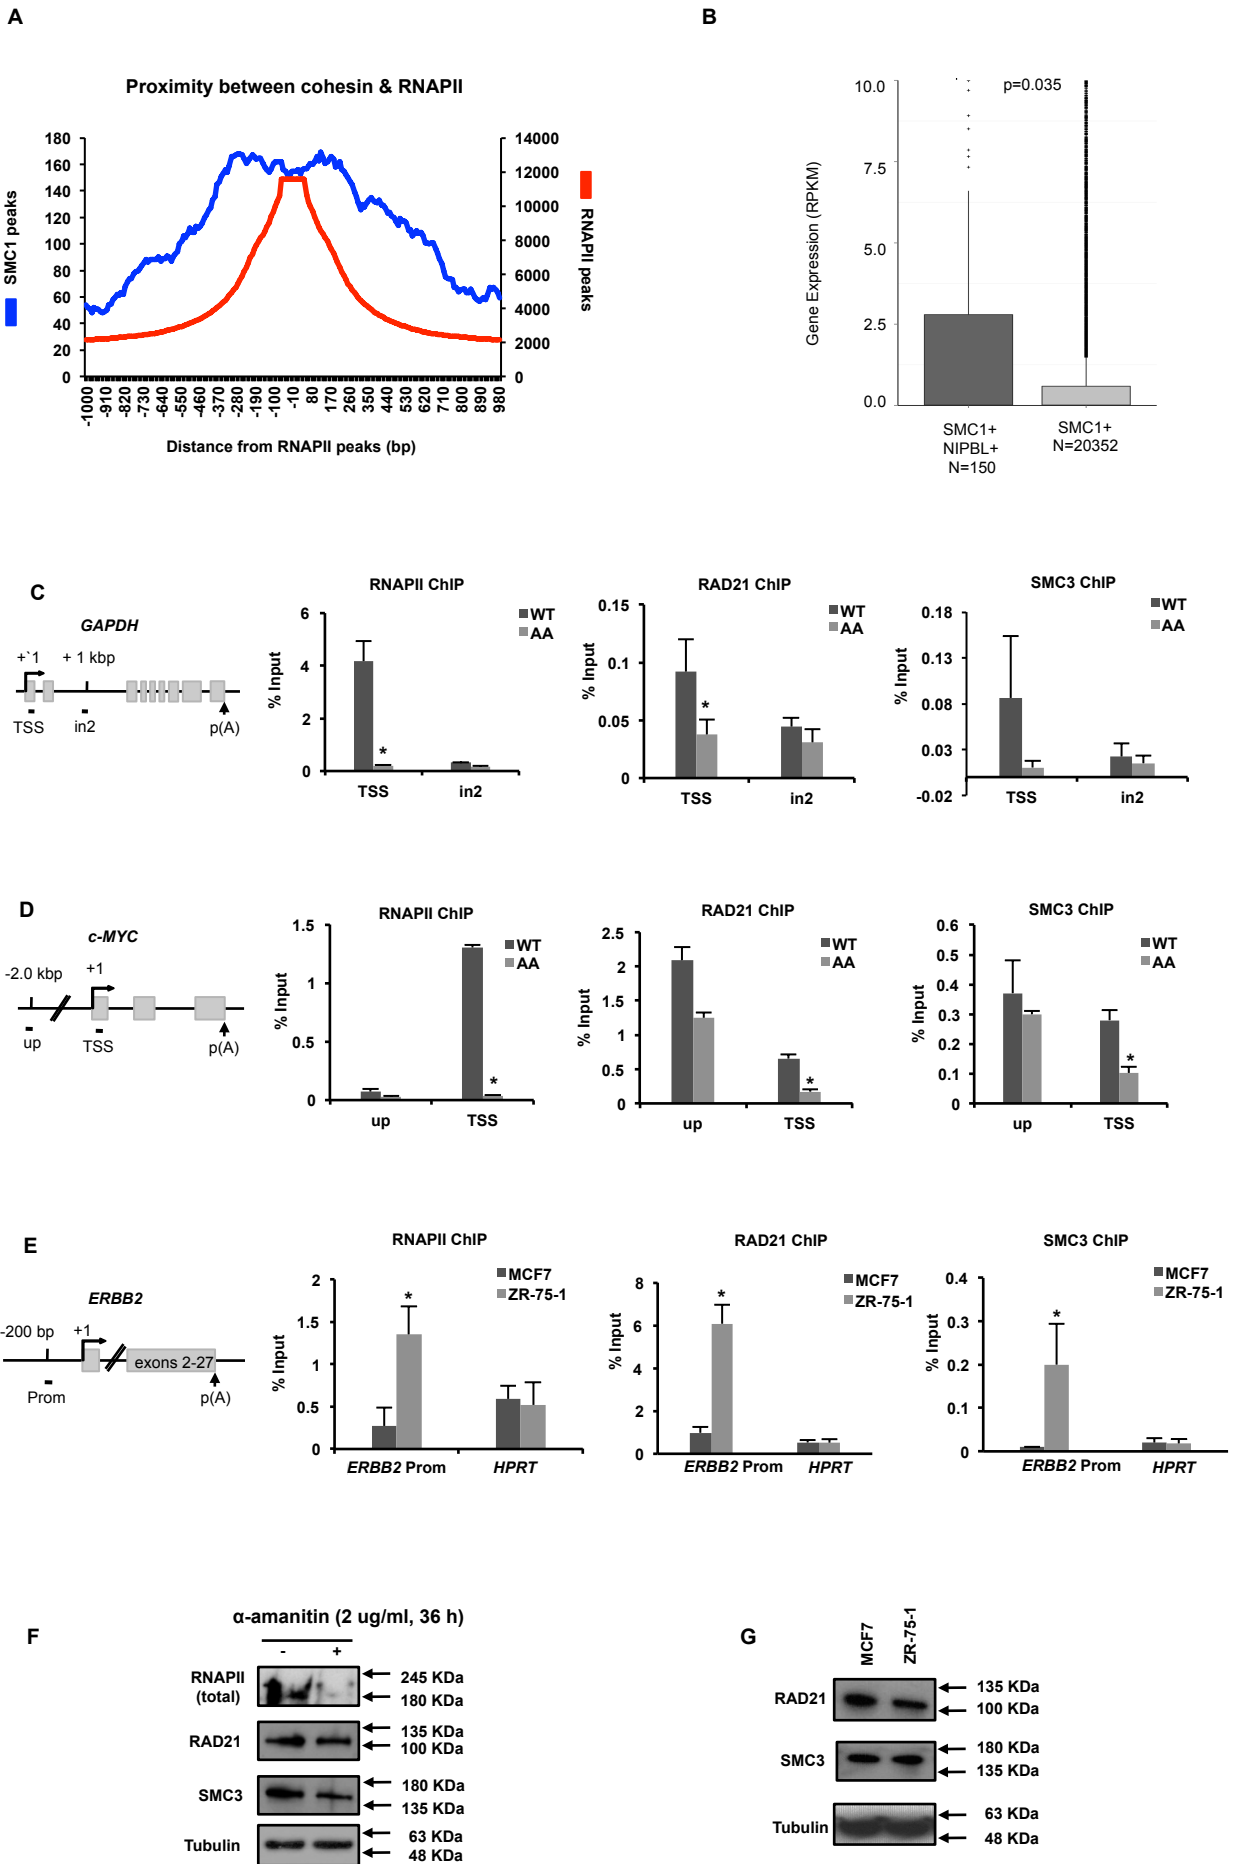

A

Cohesin (1058 peaks) distribution in *S. cerevisiae*, relative to RNAPII & III

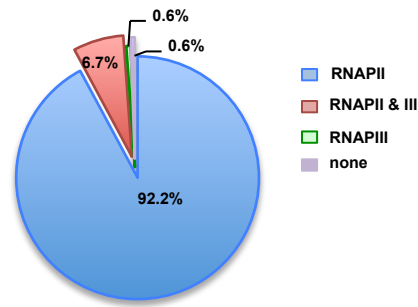

B

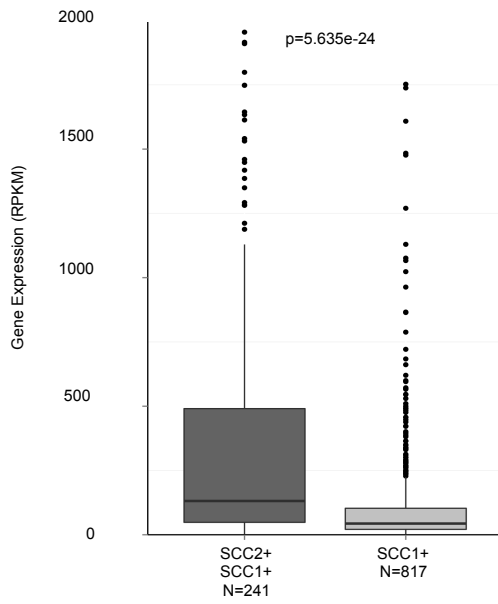

C

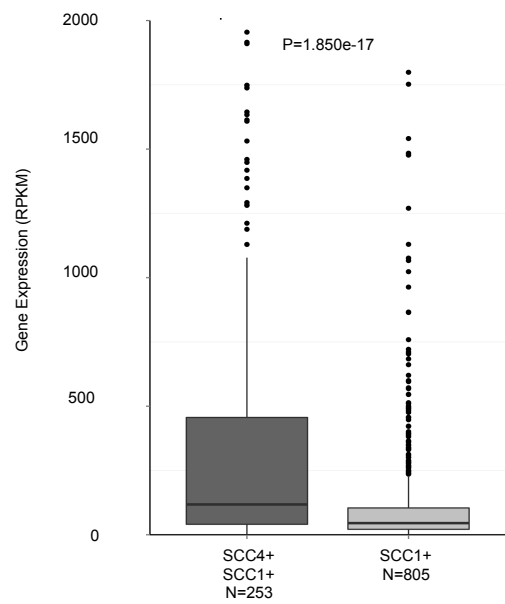

D

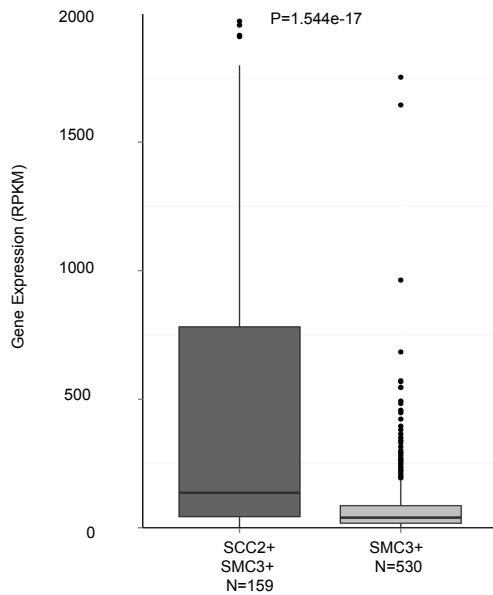

E

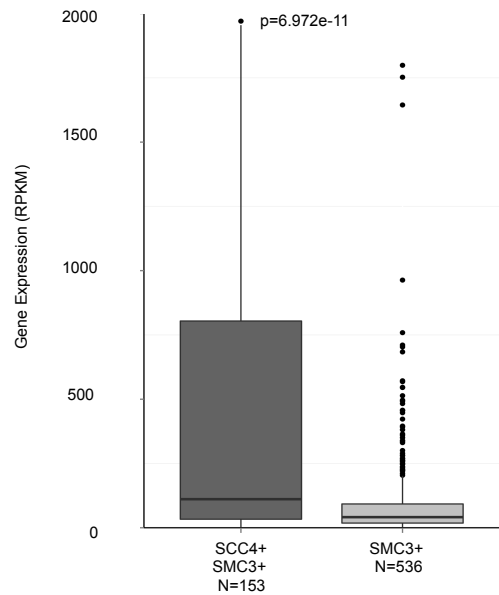

A

“Hyperchipable regions” plotted relative to *Scs2+*/*Scs1+* & *Scs1+* or *Scs4+*/*Scs1+* & *Scs1+* sites in *S. cerevisiae*

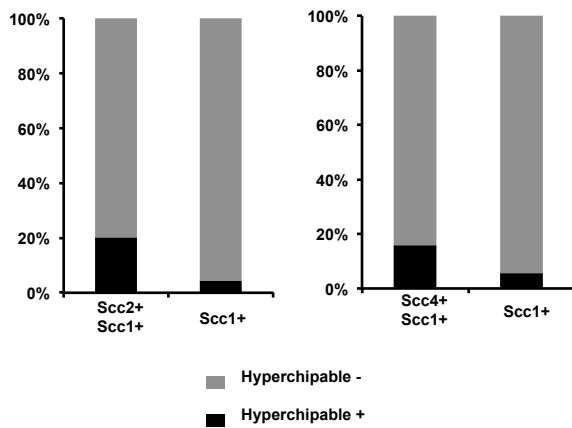

B

“Hyperchipable regions” plotted relative to *Scs2+*/*Scs3+* & *Scs3+* or *Scs4+*/*Scs3+* & *Scs3+* sites in *S. cerevisiae*

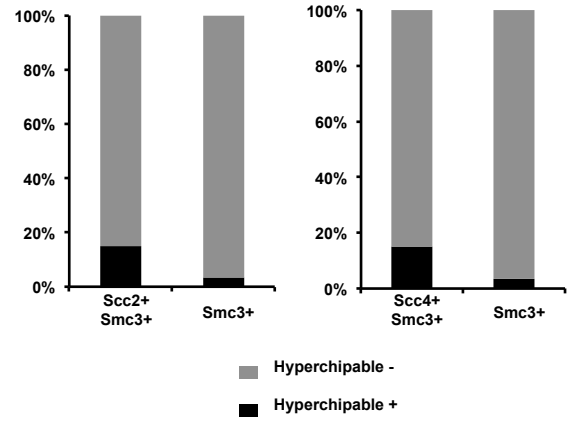

C

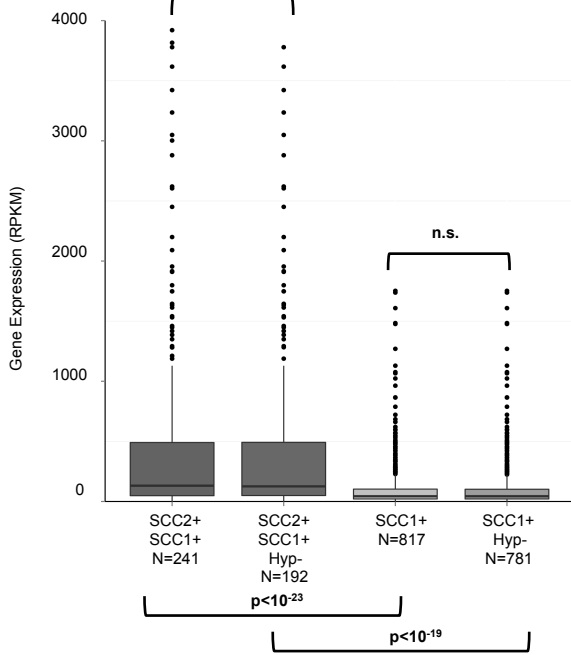

D

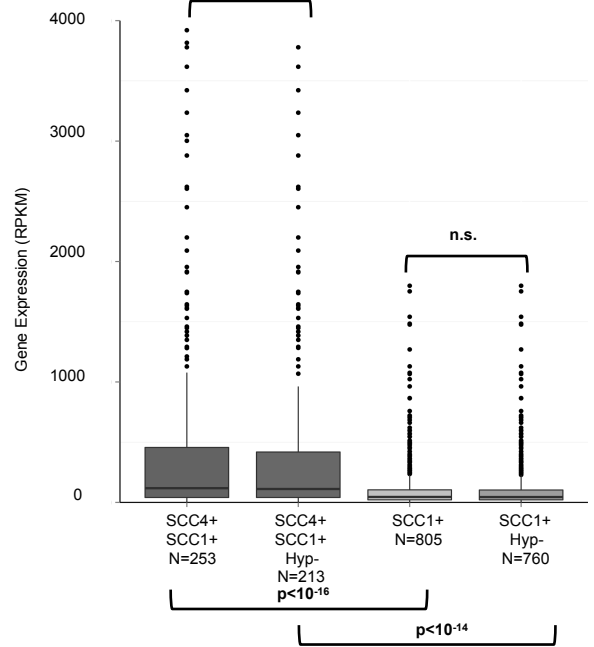

E

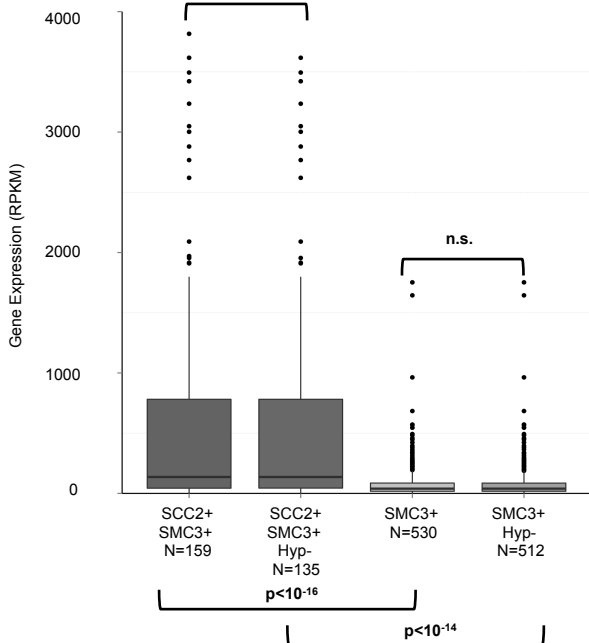

F

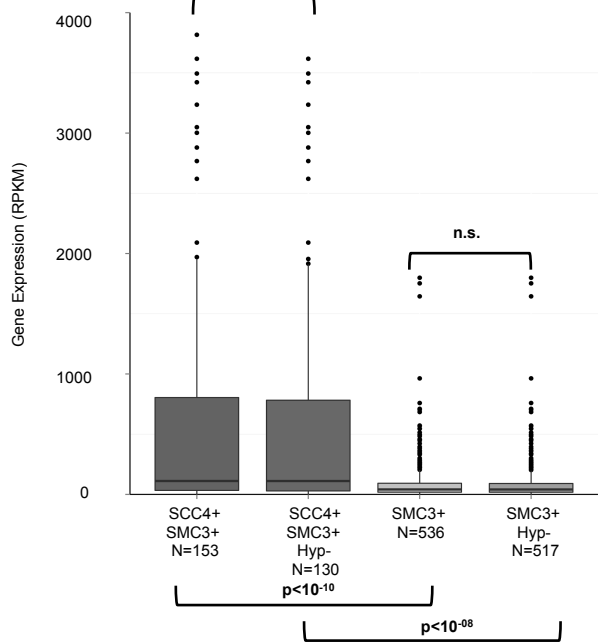



Mis4+/Rad21+

high transcription  
stable cohesion

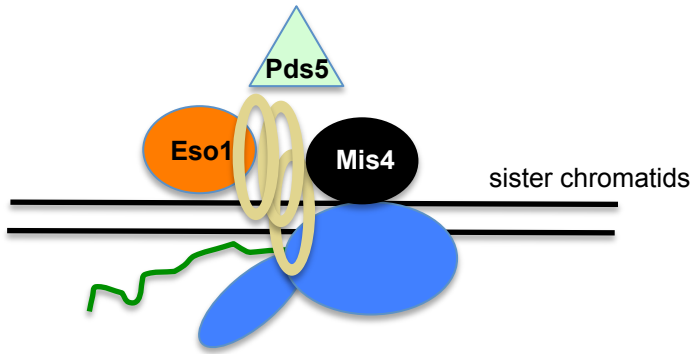

Rad21+

low transcription  
unstable cohesion

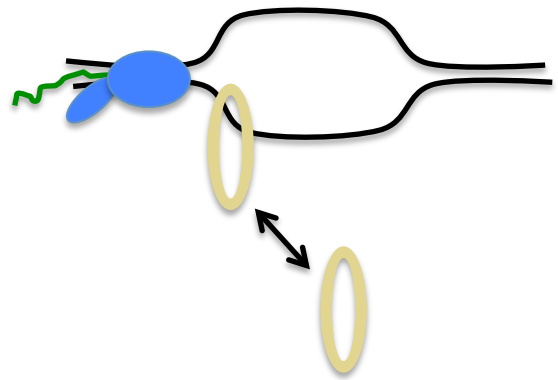

Supplement: supp_gkw252_nar-00155-v-2016-File004.pdf [file supp_gkw252_nar-00155-v-2016-File004.pdf]
