# Supplementary material for: Transcription facilitates sister chromatid cohesion on chromosomal arms
Source: PubMed Central journal article supplement (PMC5001582; doi:10.1093/nar/gkw252), 2016-04-15

# CAR1

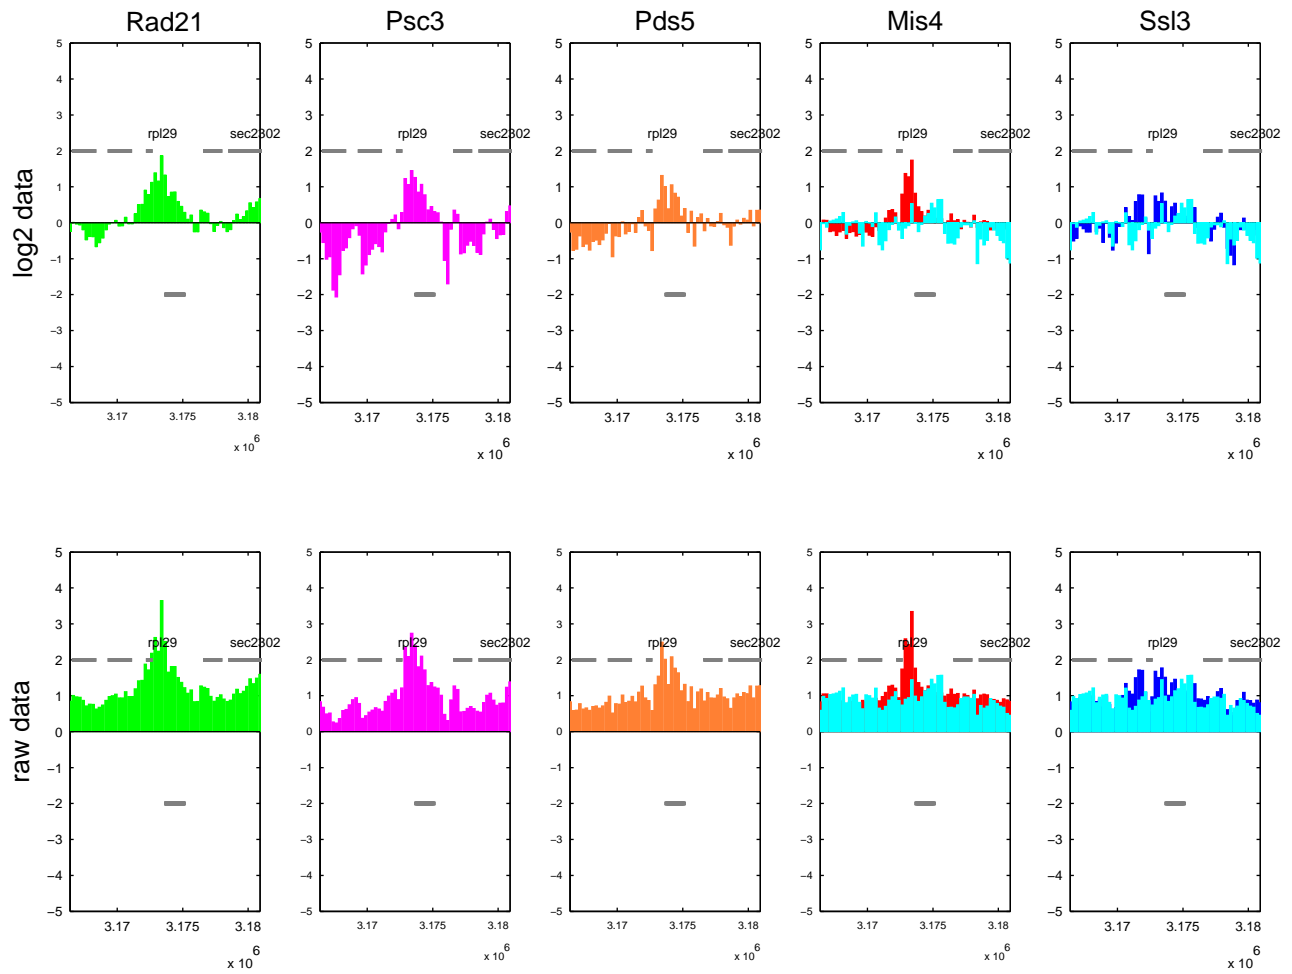

# CAR2

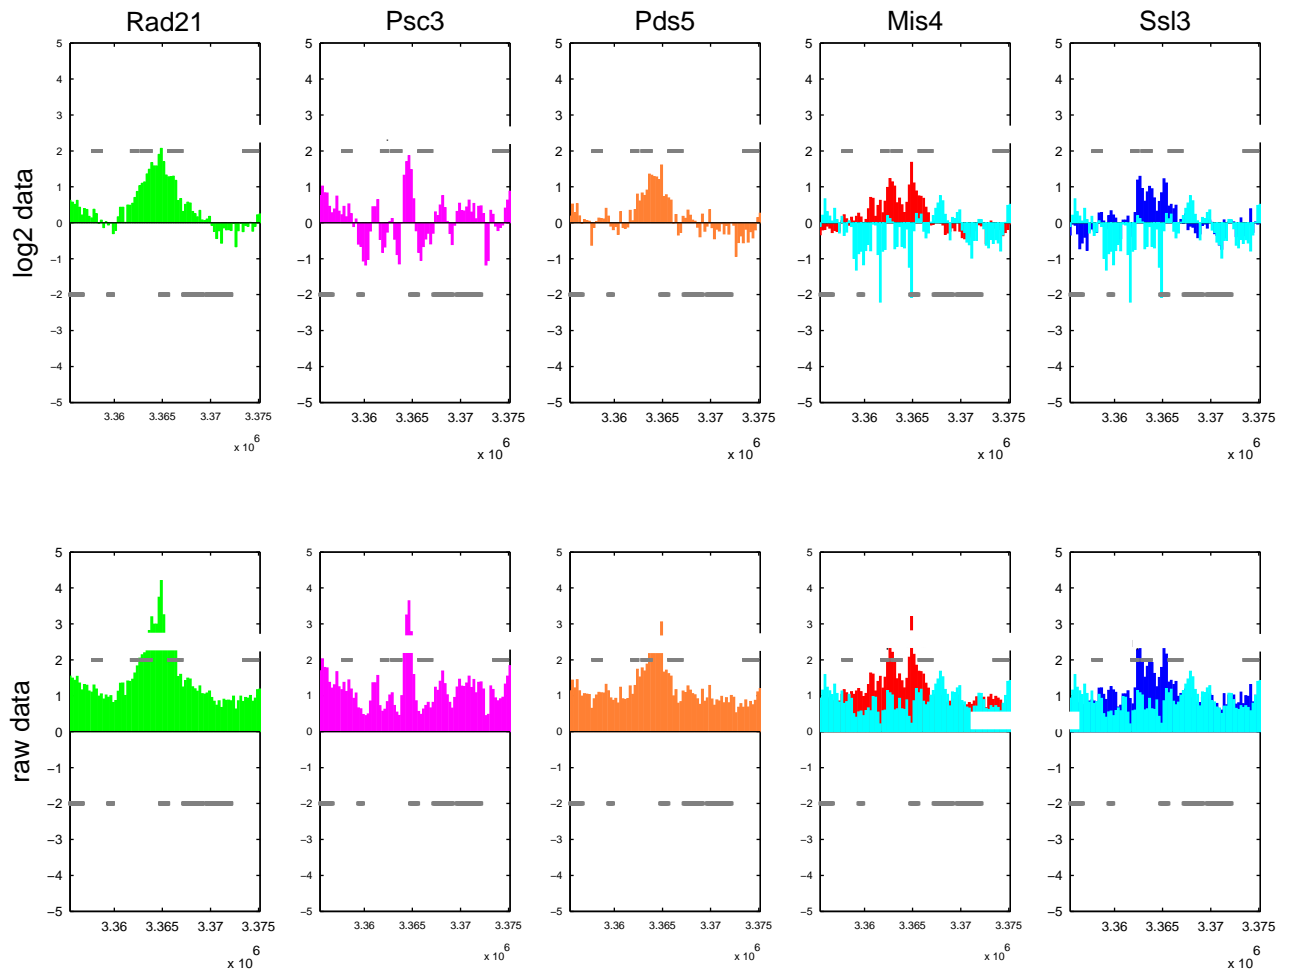

# CAR3

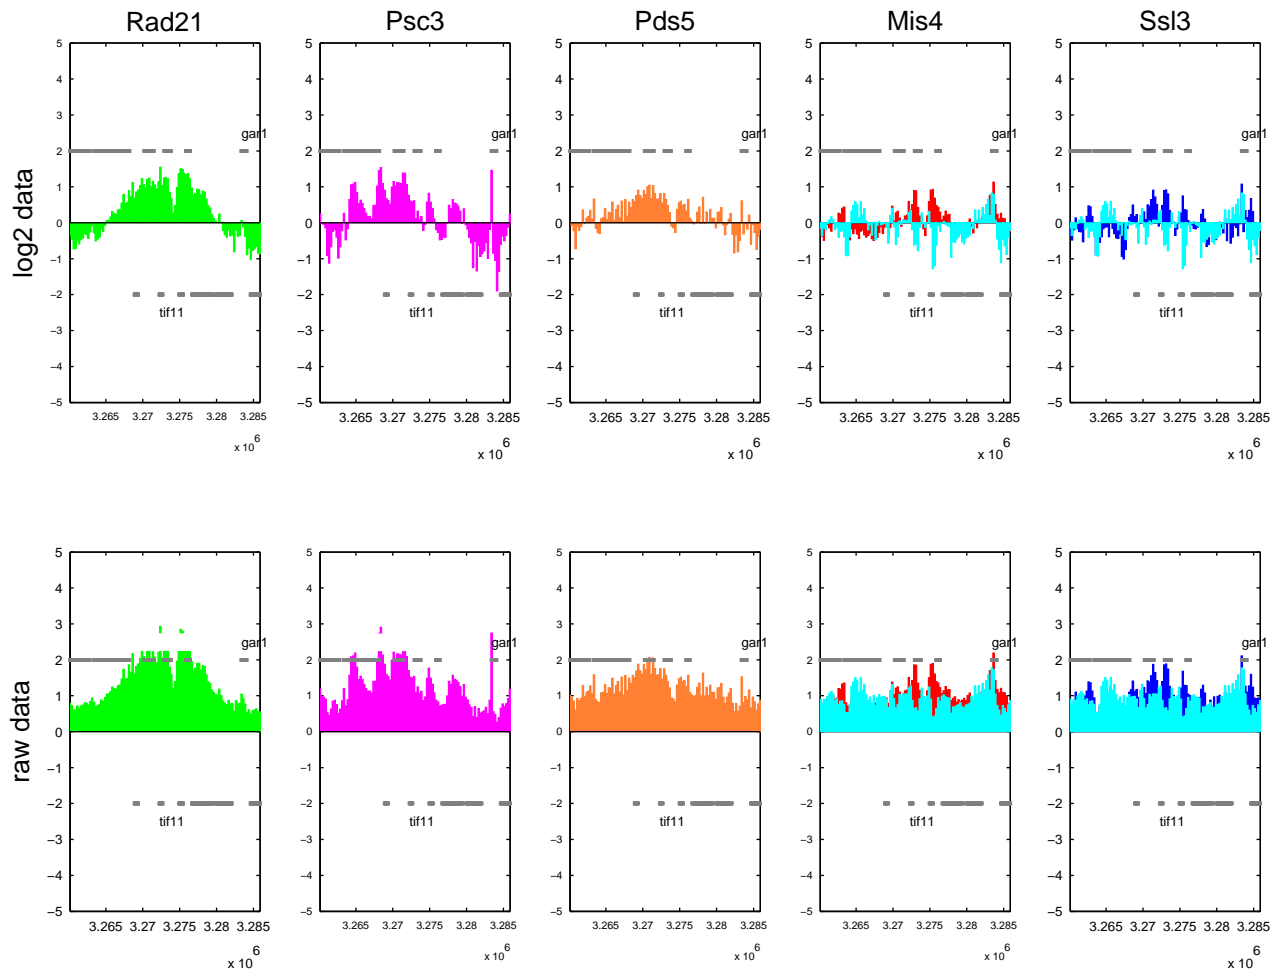

# CAR4

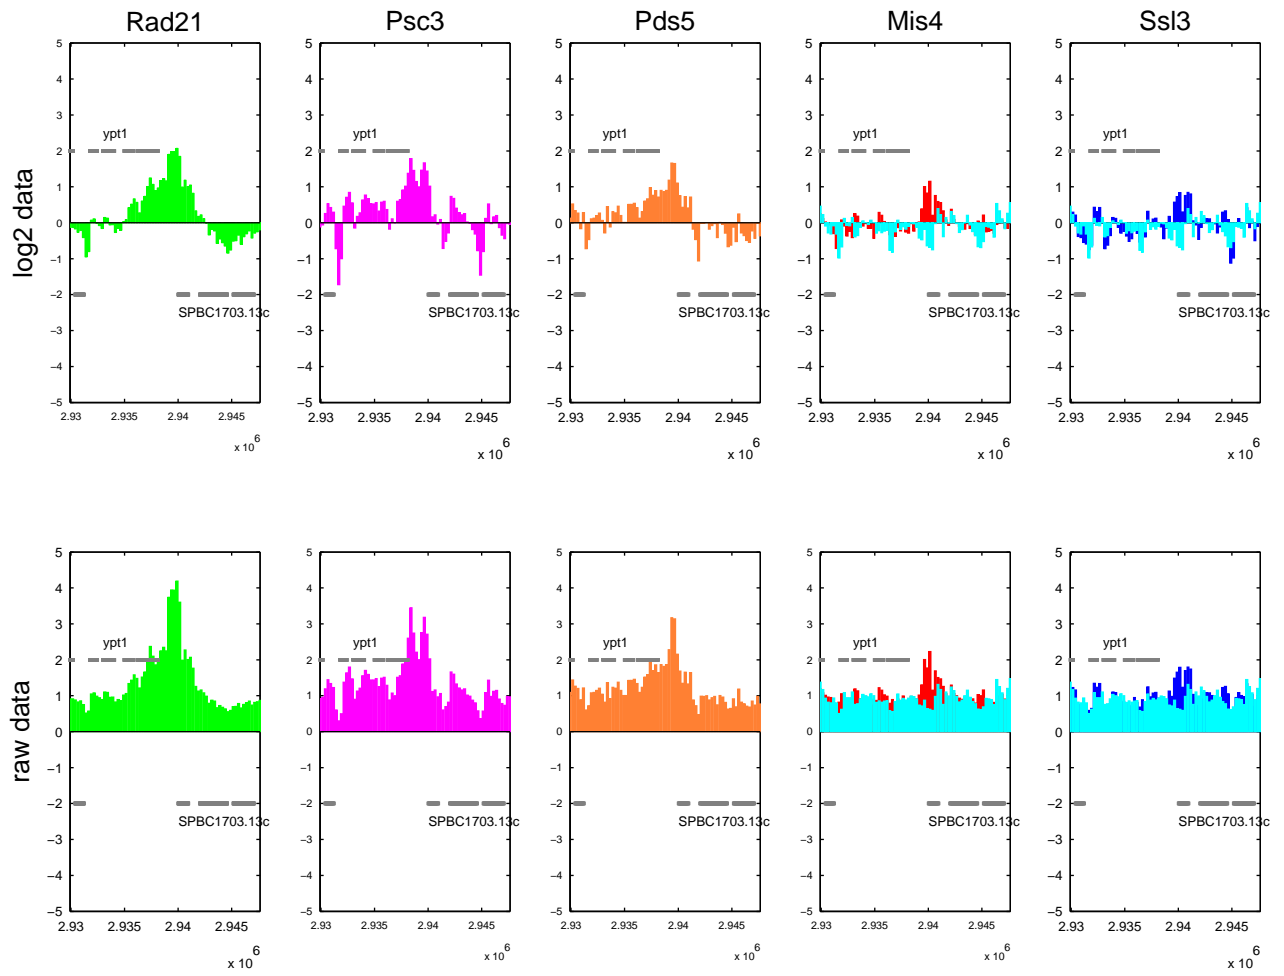

# CAR5

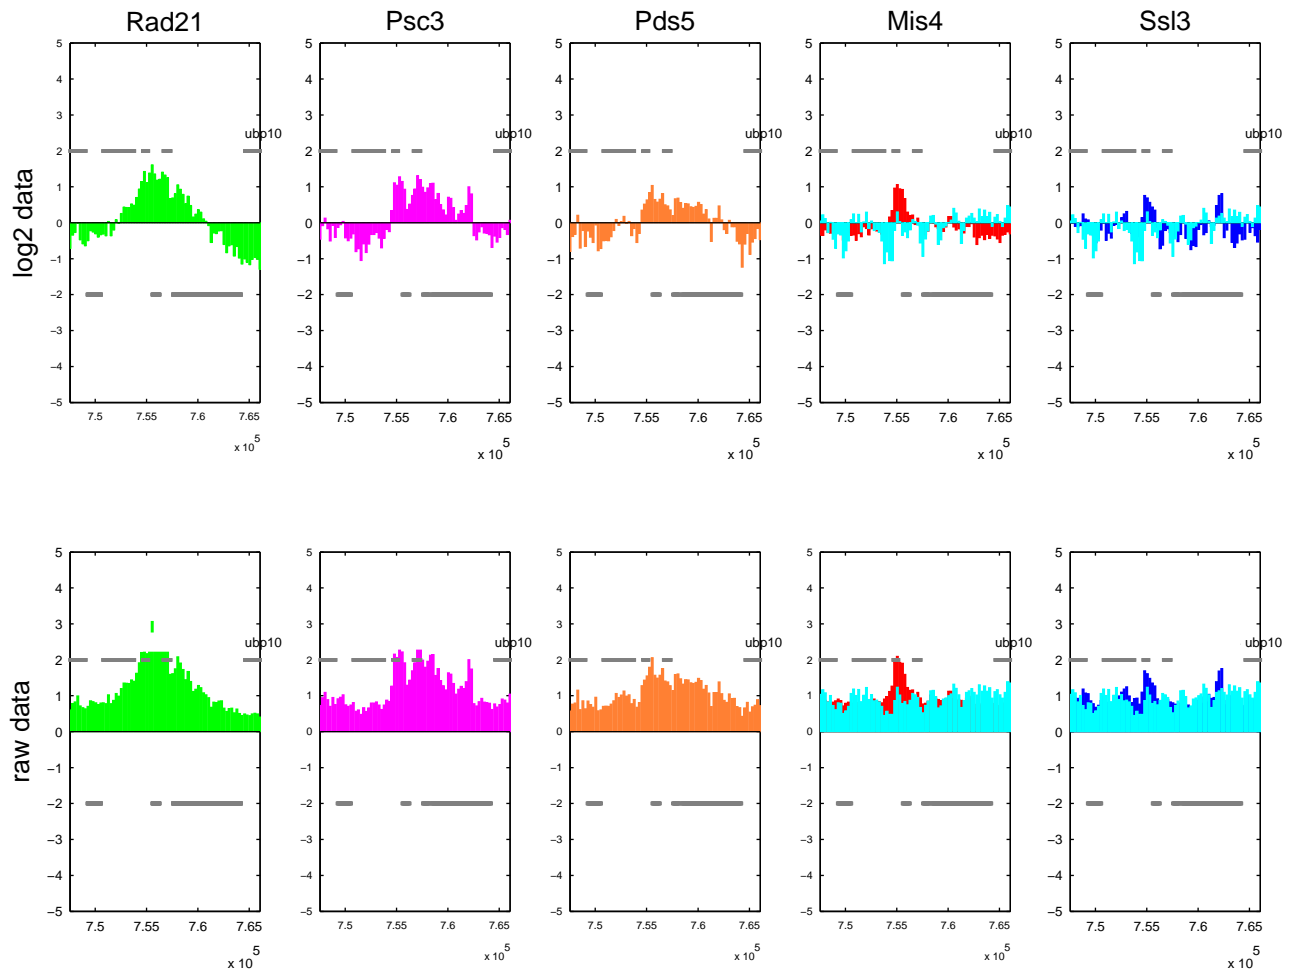

# CAR6

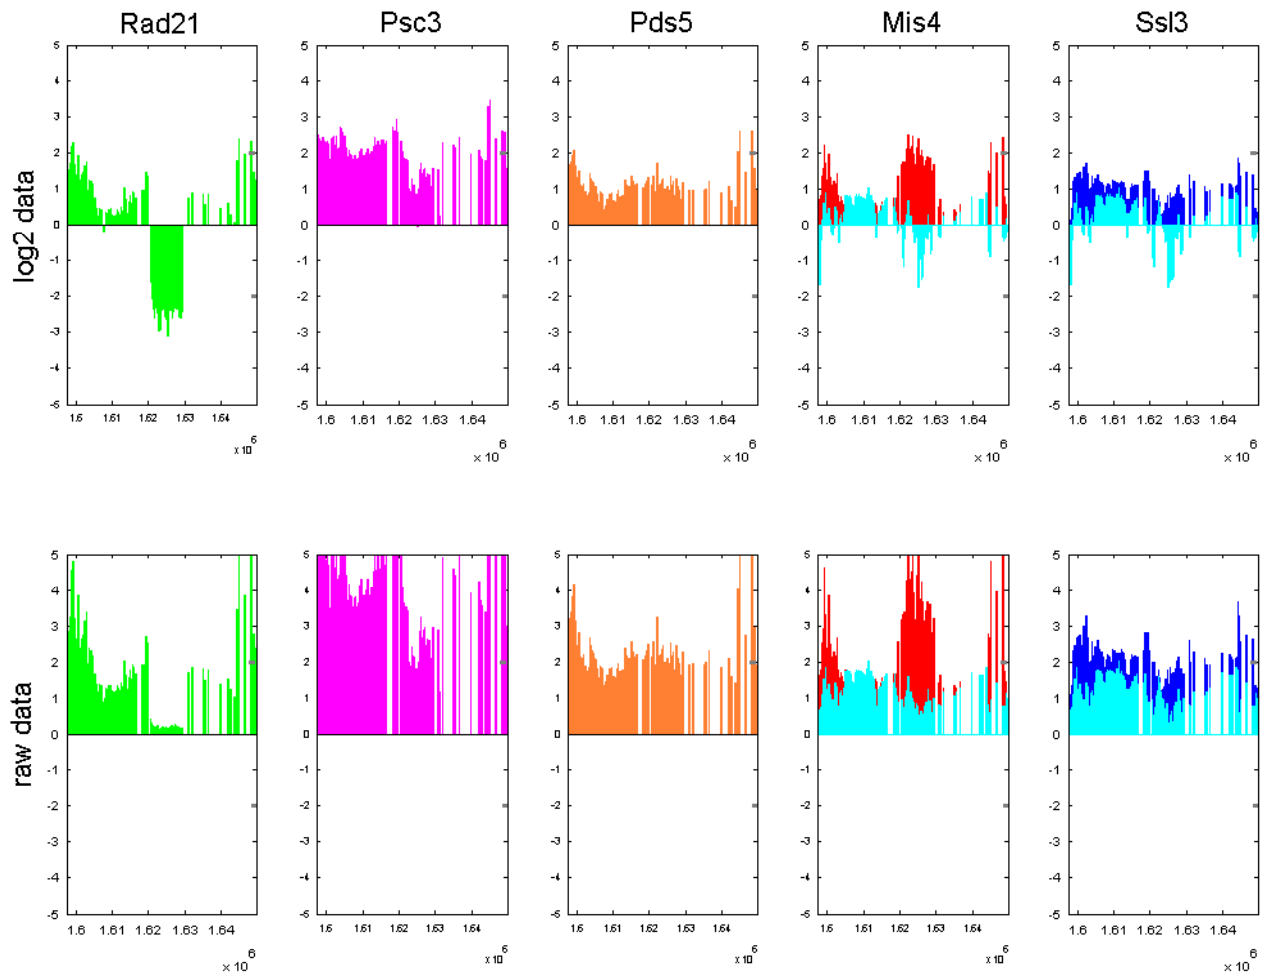

# CAR7

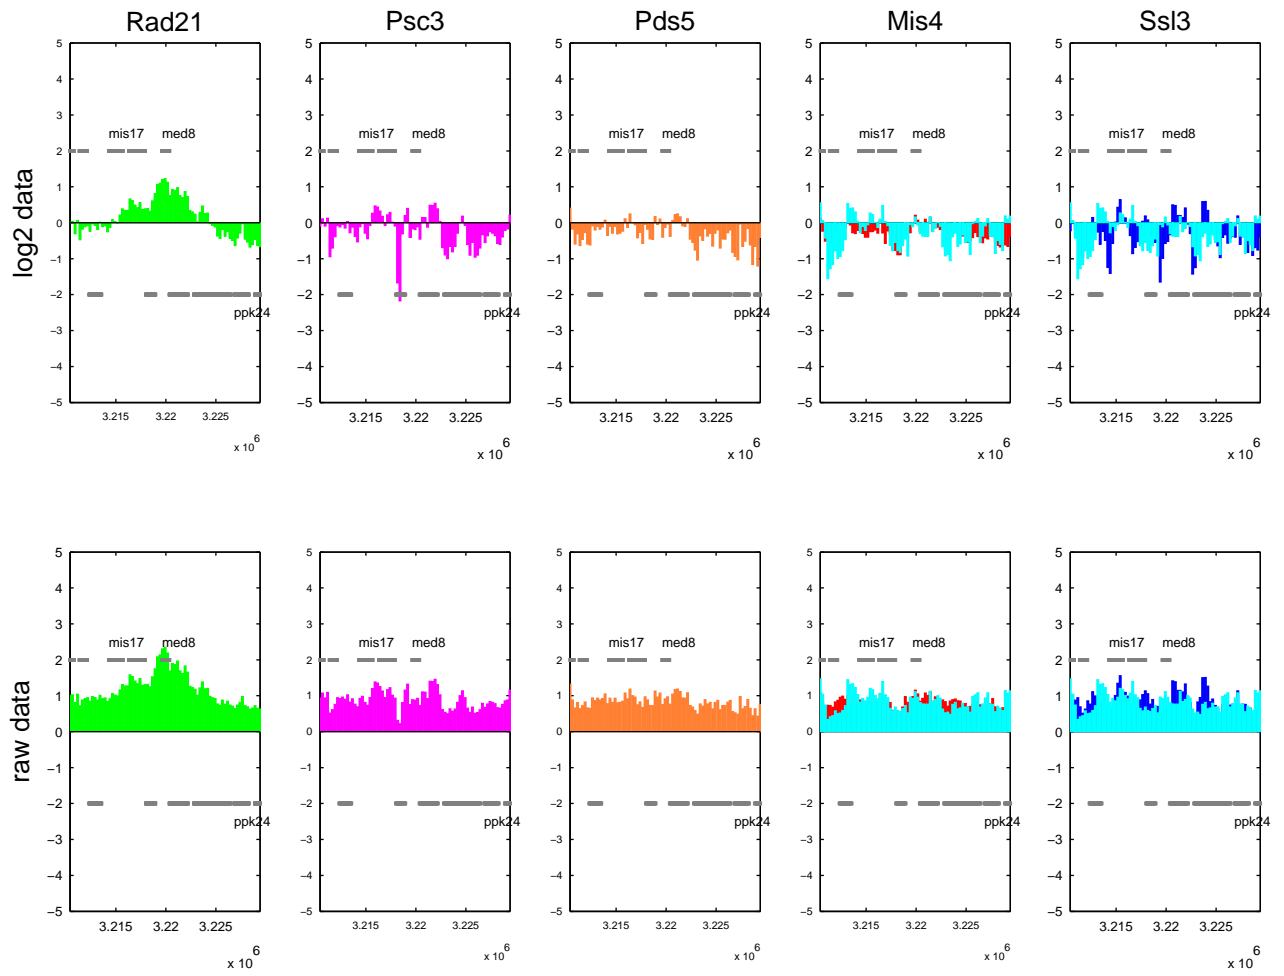

# CAR8

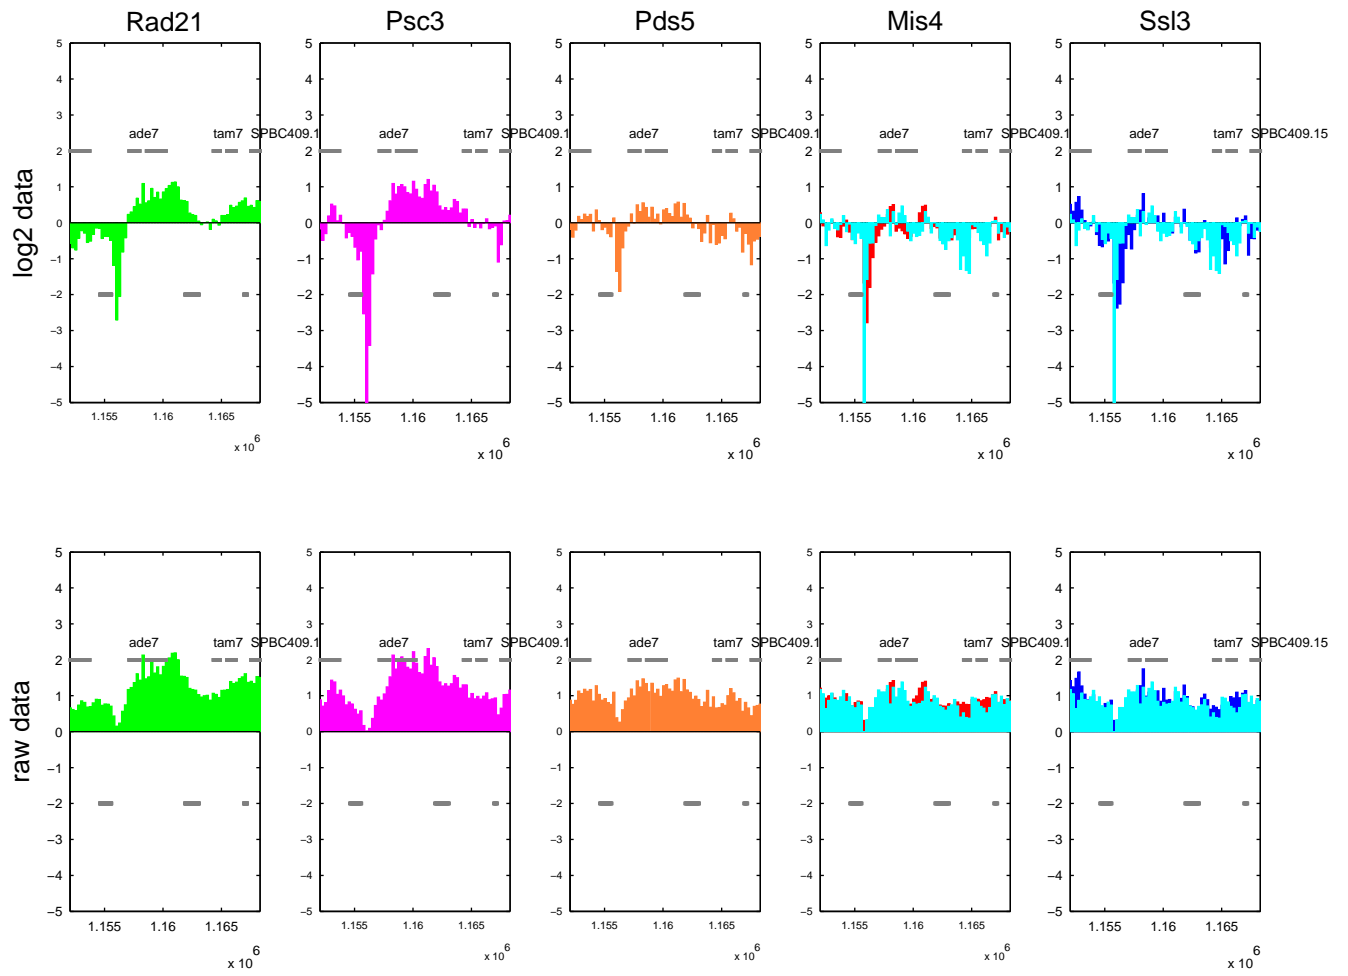



# CAR9

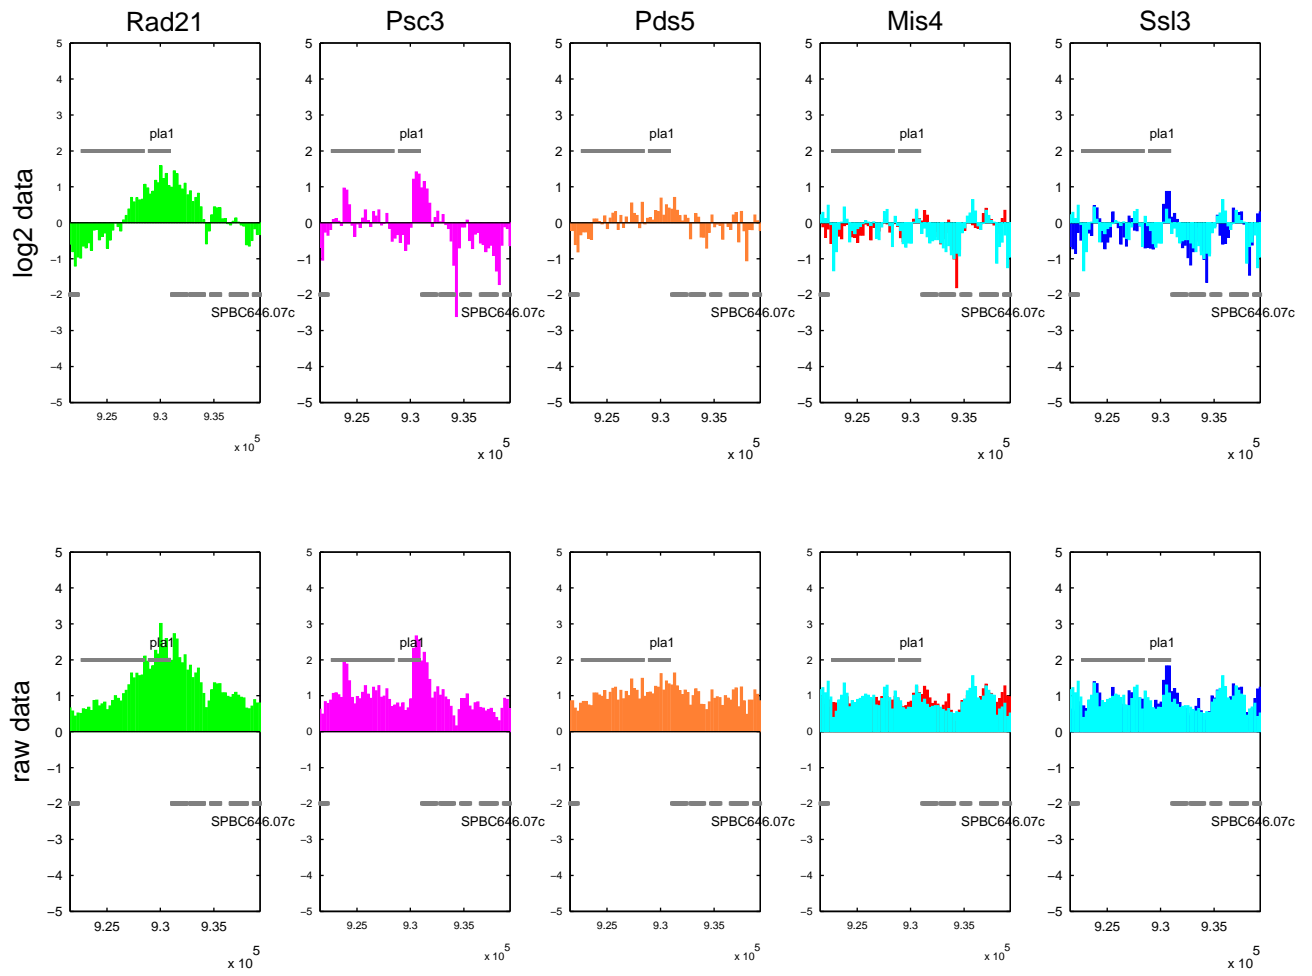

# CAR10

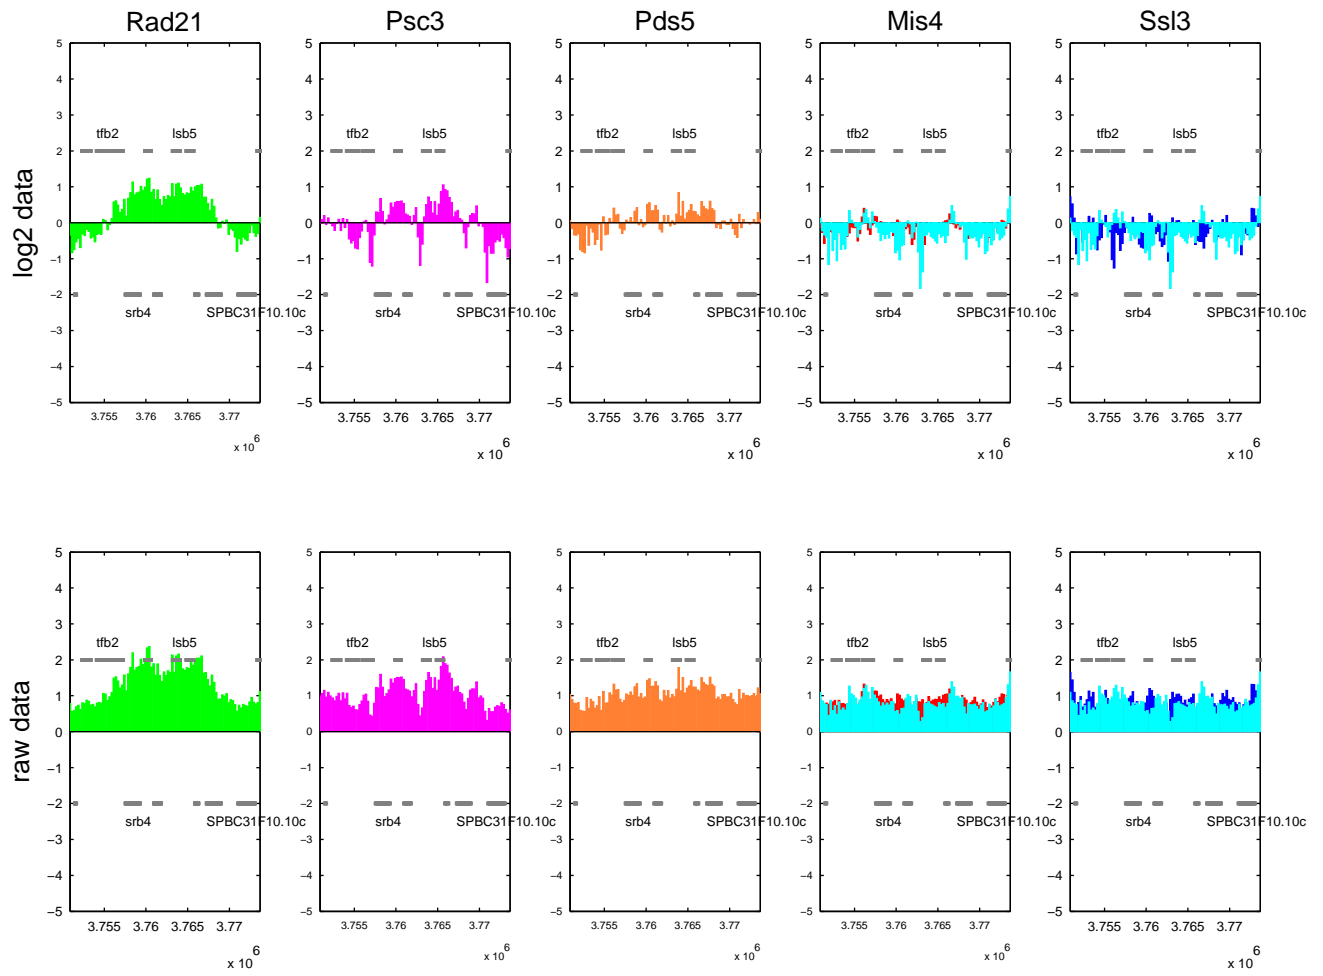

# CAR11

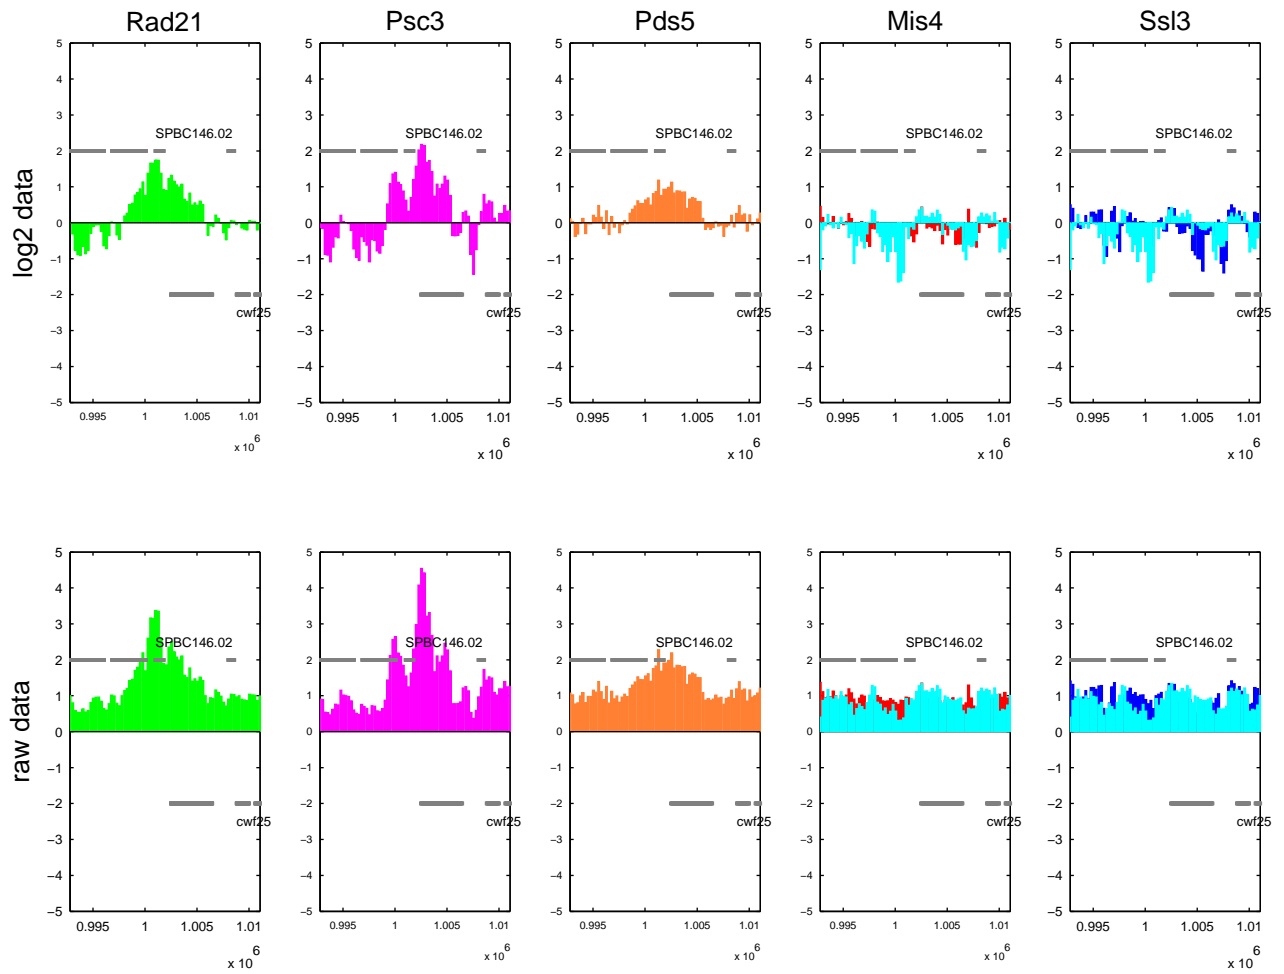

# CAR12

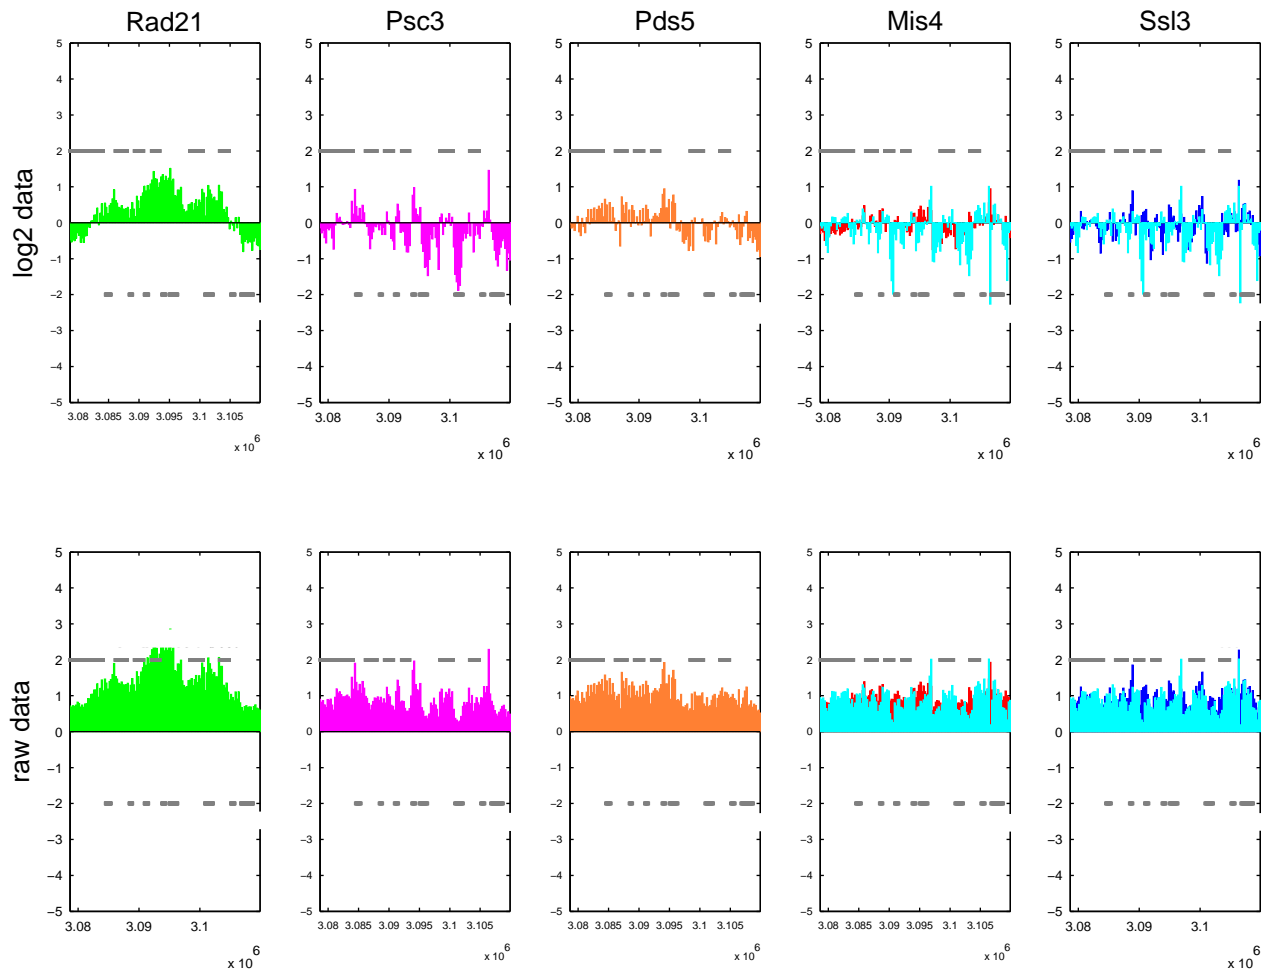

Supplement: supp_gkw252_nar-00155-v-2016-File005.pdf [file supp_gkw252_nar-00155-v-2016-File005.pdf]
