# Supplementary material for: Transcription facilitates sister chromatid cohesion on chromosomal arms
Source: PubMed Central journal article supplement (PMC5001582; doi:10.1093/nar/gkw252), 2016-04-15
Supplement: supp_gkw252_nar-00155-v-2016-File007.pdf [file supp_gkw252_nar-00155-v-2016-File007.pdf]

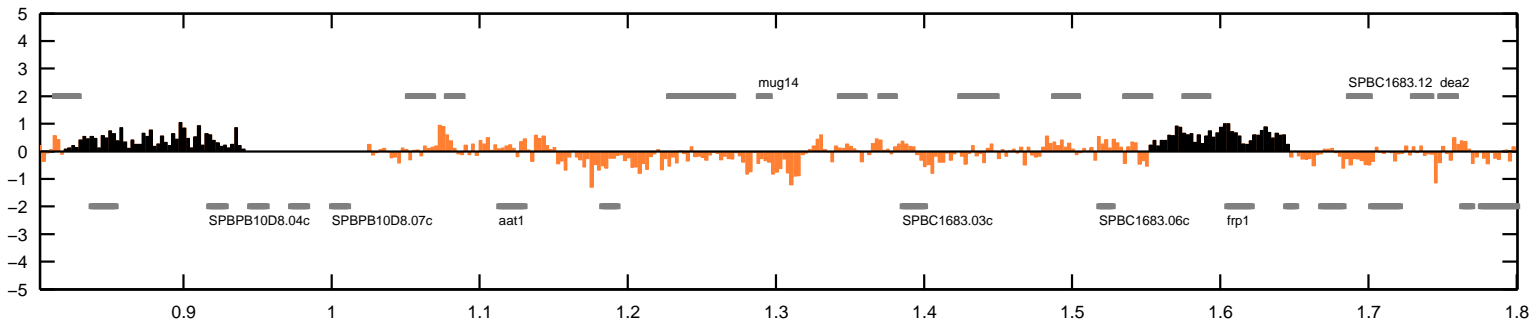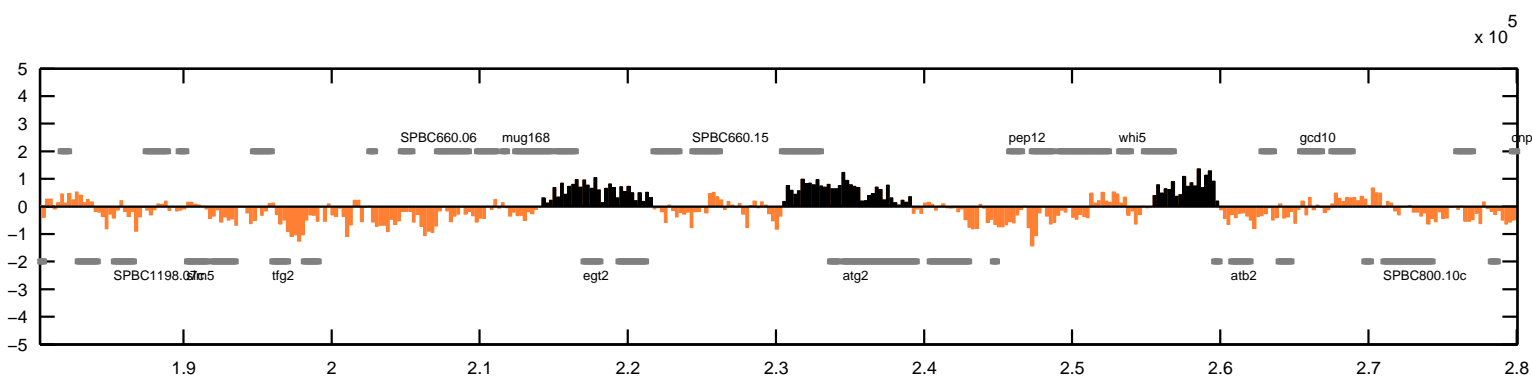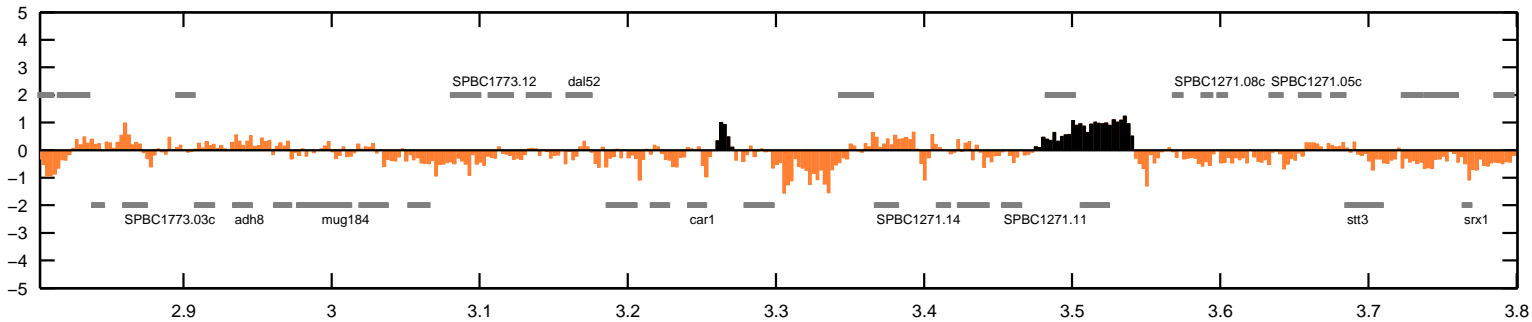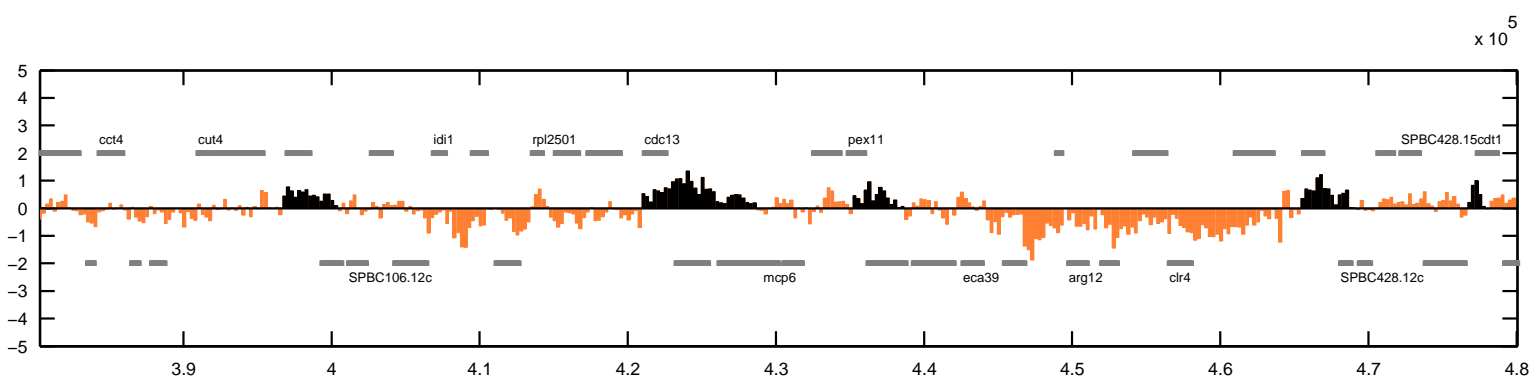

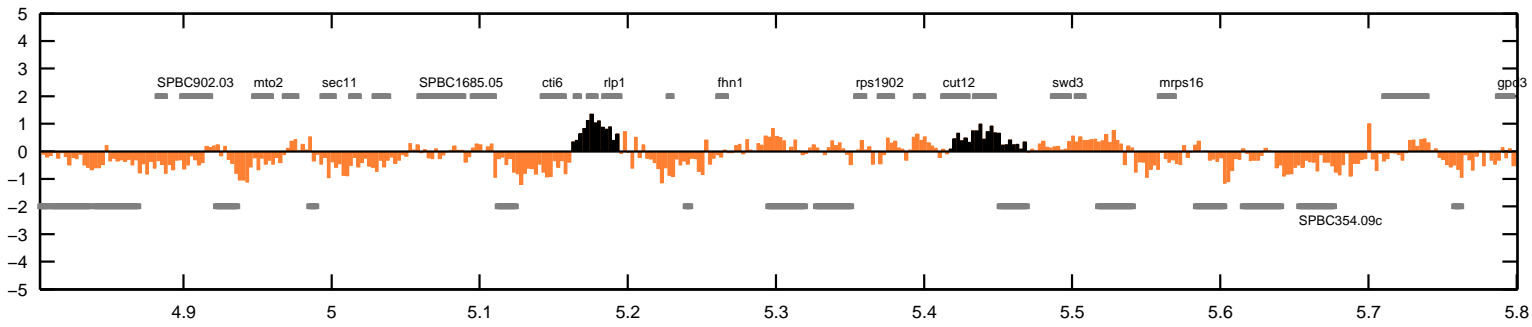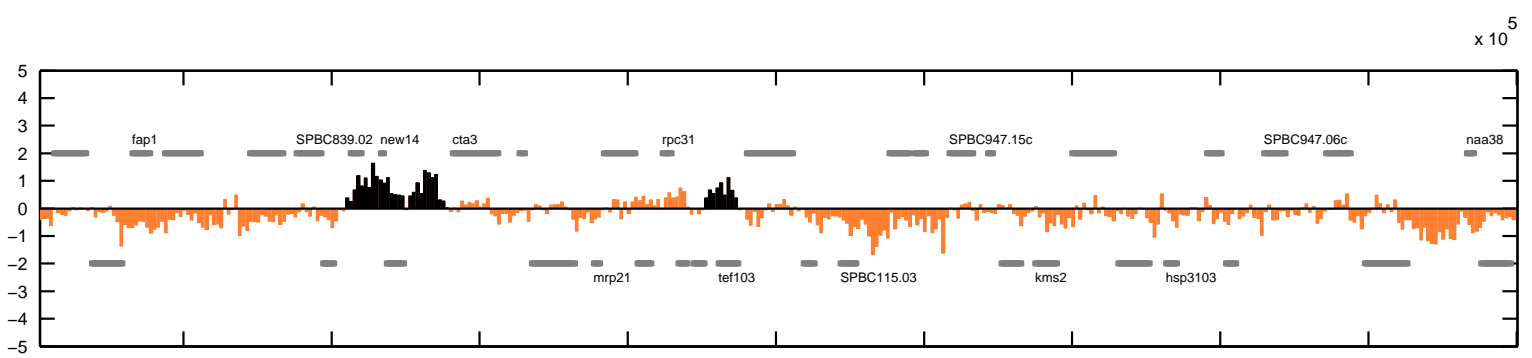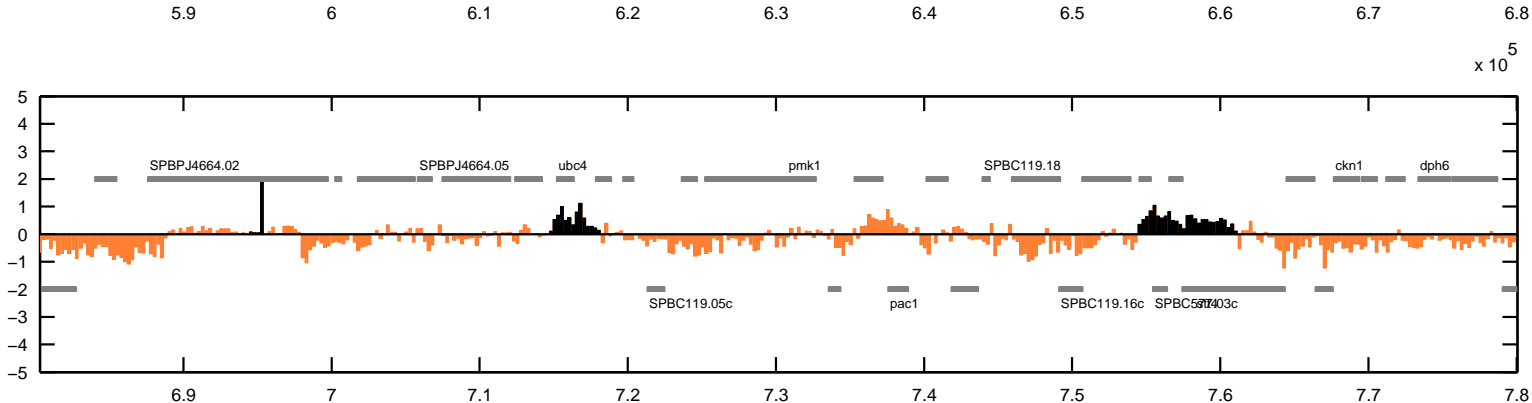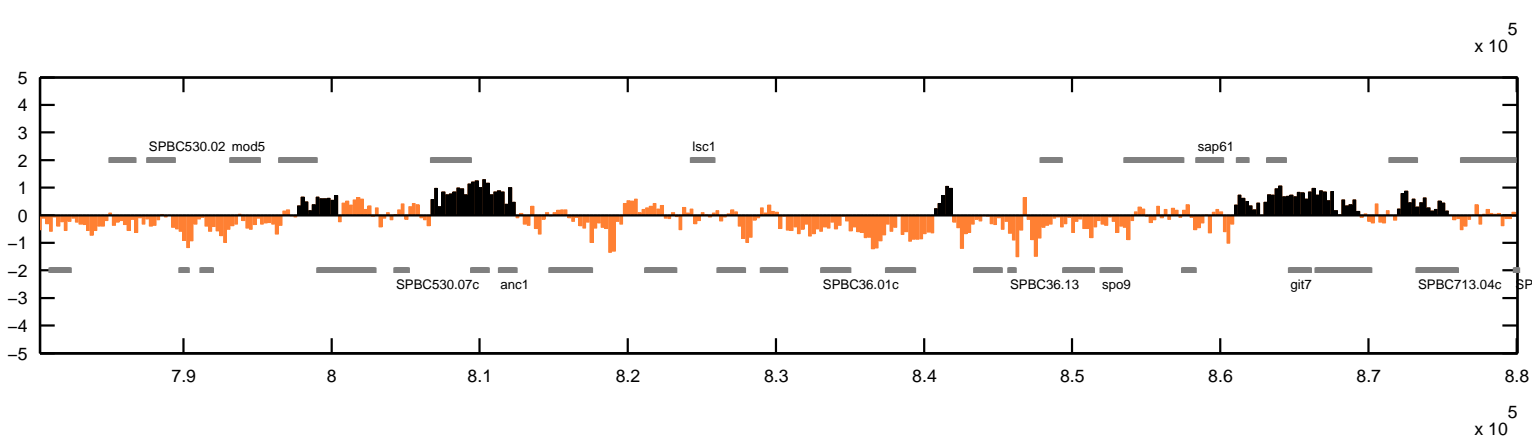

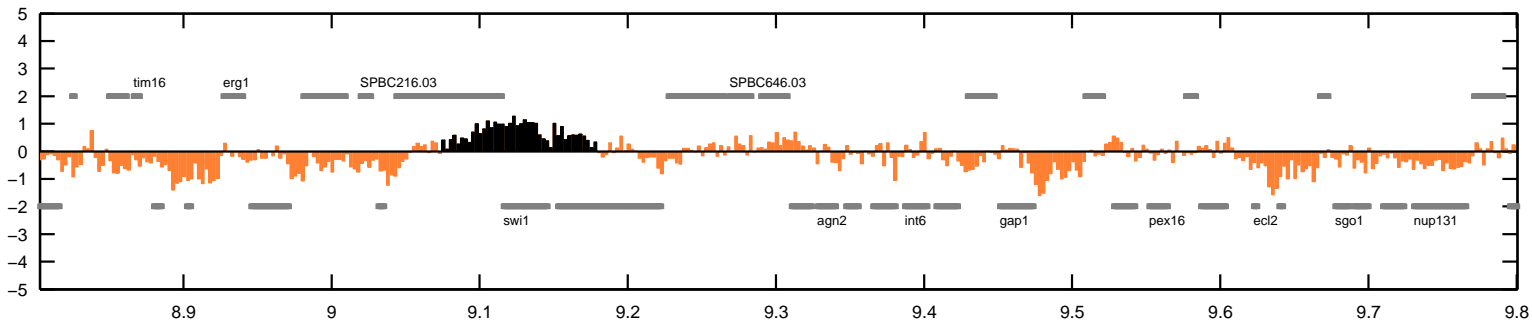

$\times 10^5$

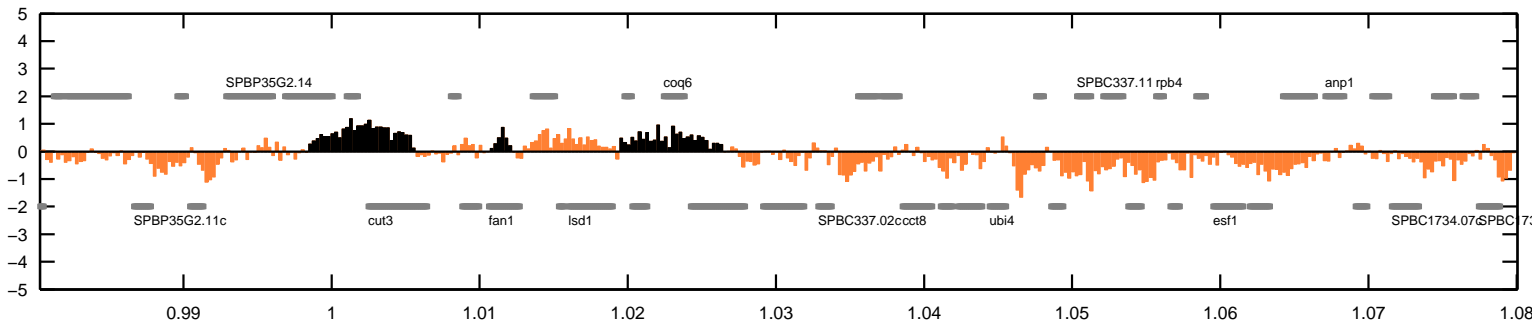

$\times 10^6$

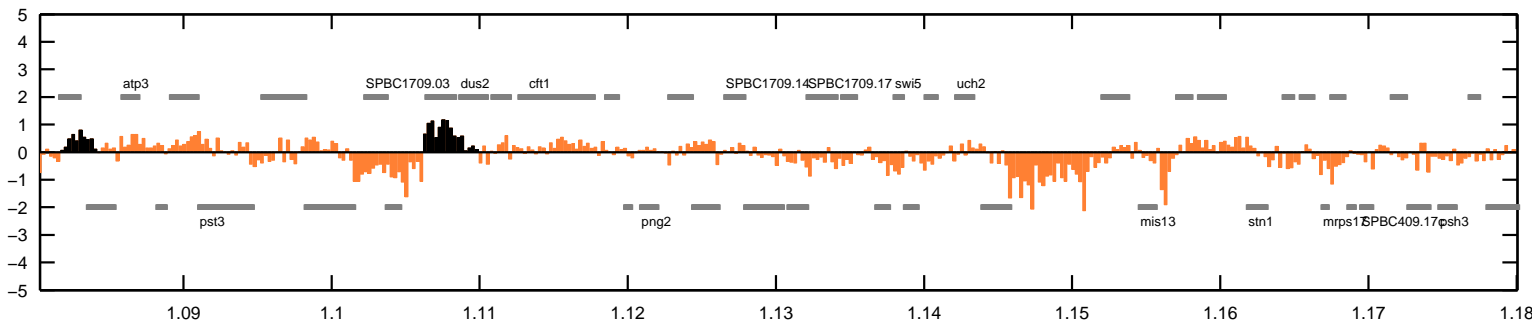

$\times 10^6$

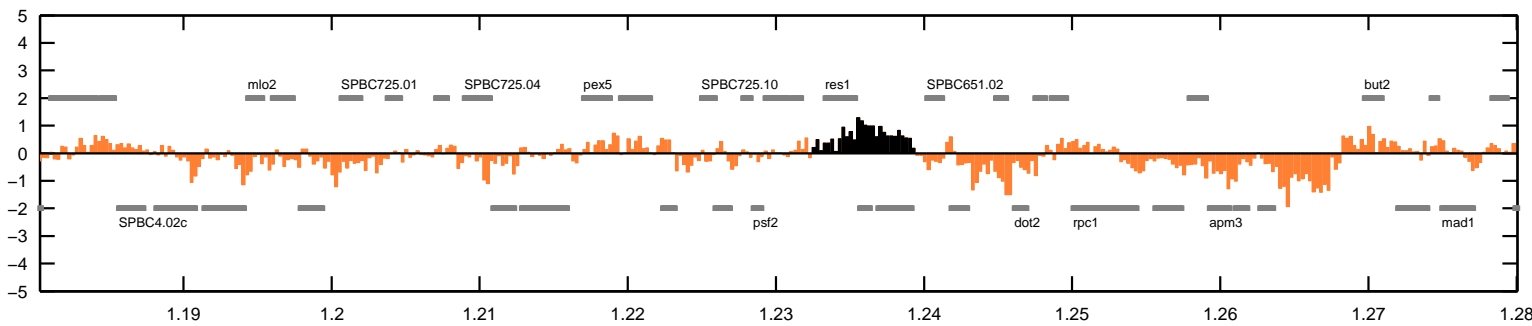

$\times 10^6$

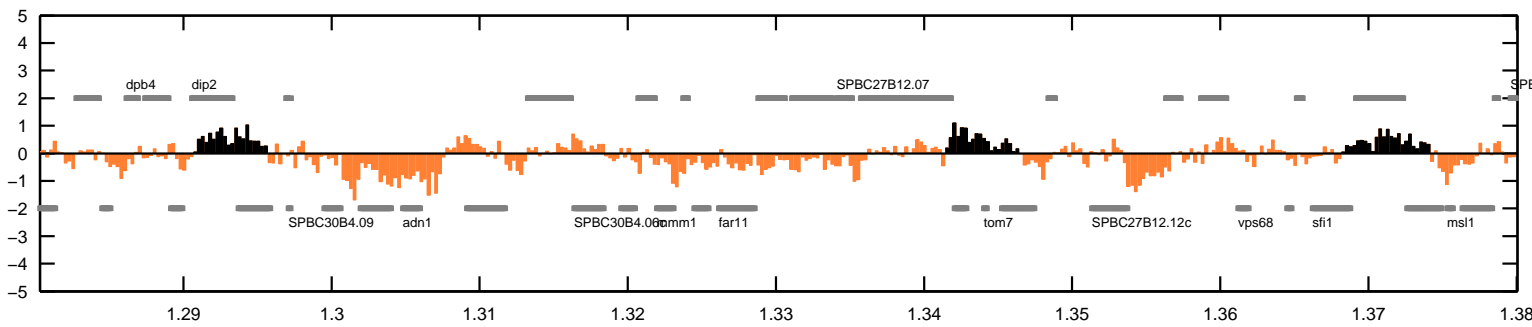

6  
x 10

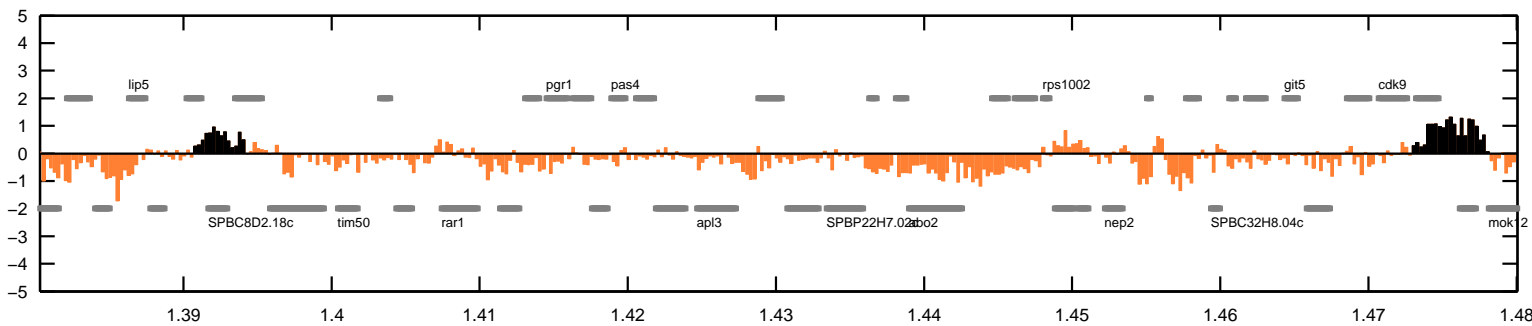

6  
x 10

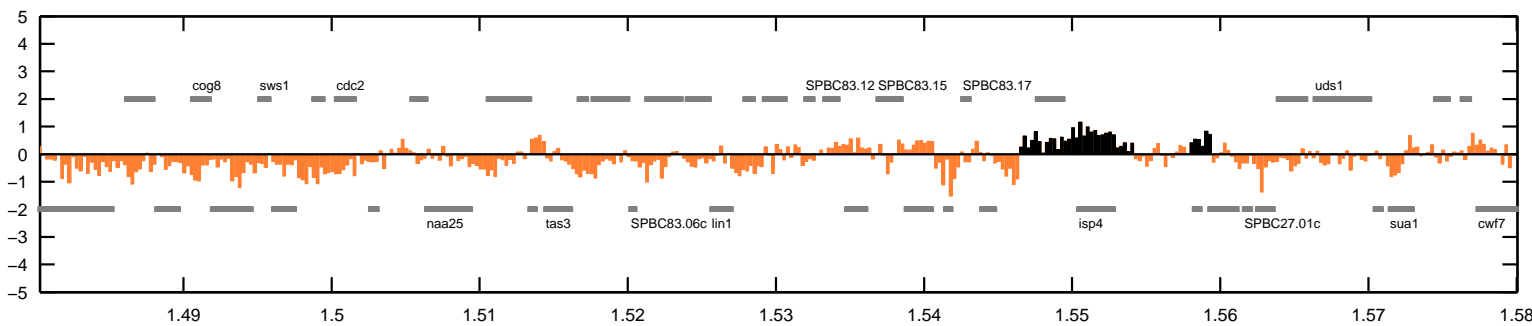

6  
x 10

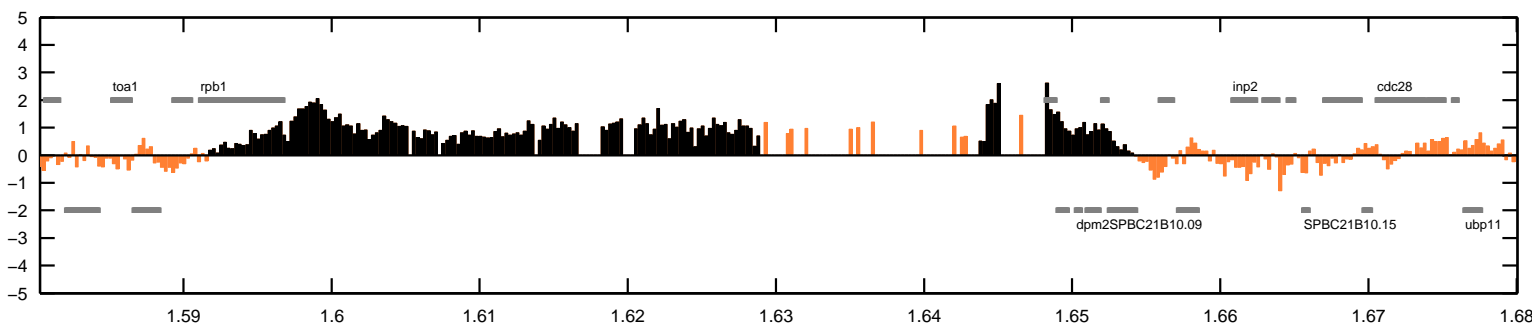

6  
x 10

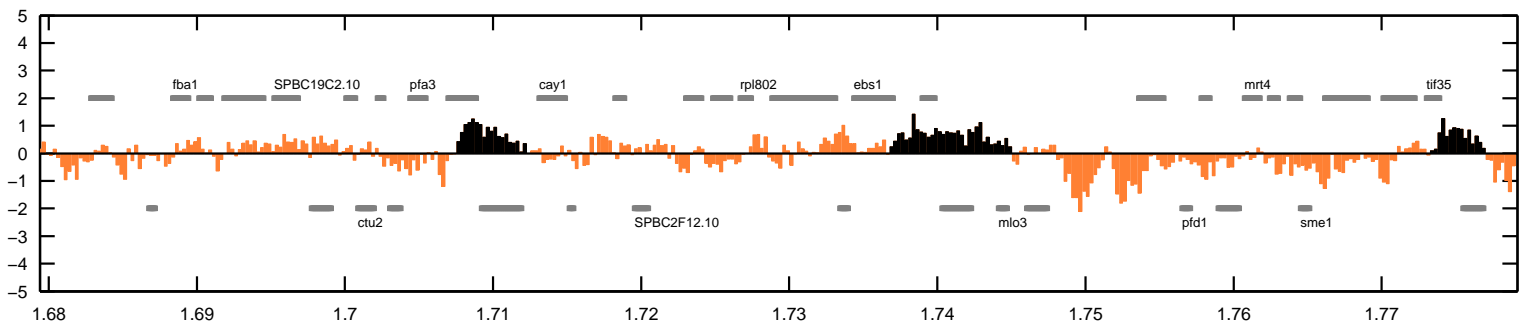

$\times 10^6$

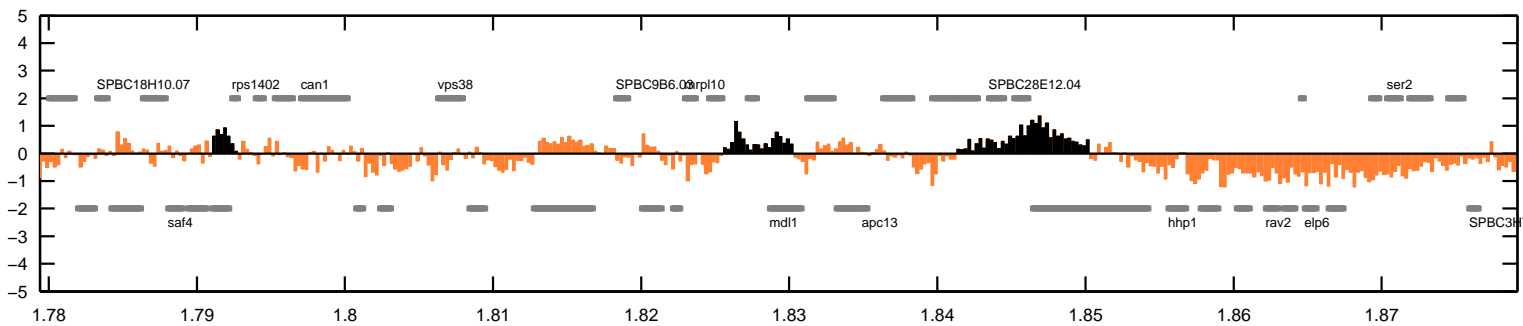

$\times 10^6$

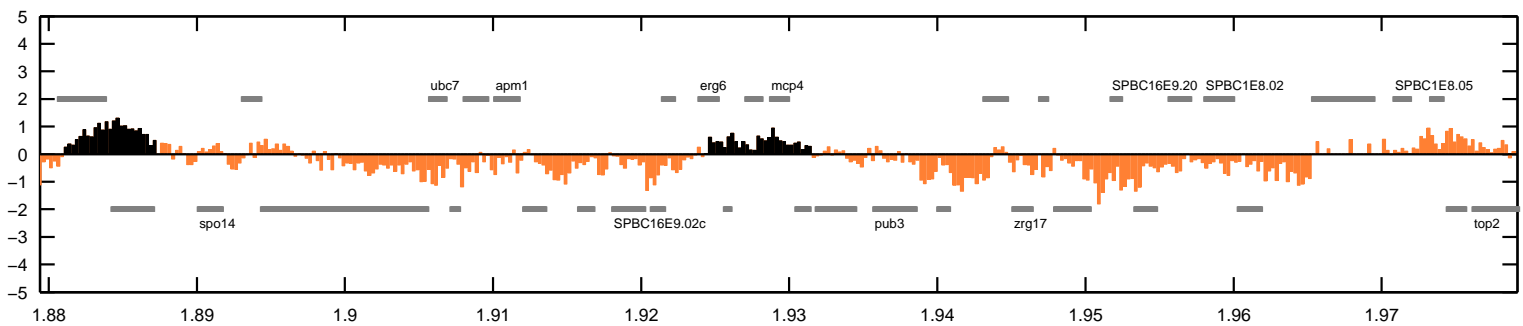

$\times 10^6$

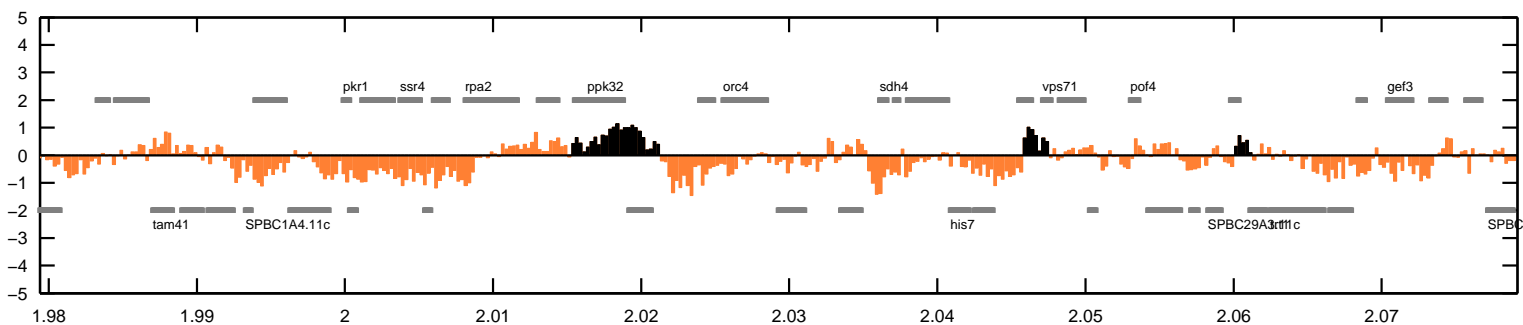

$\times 10^6$

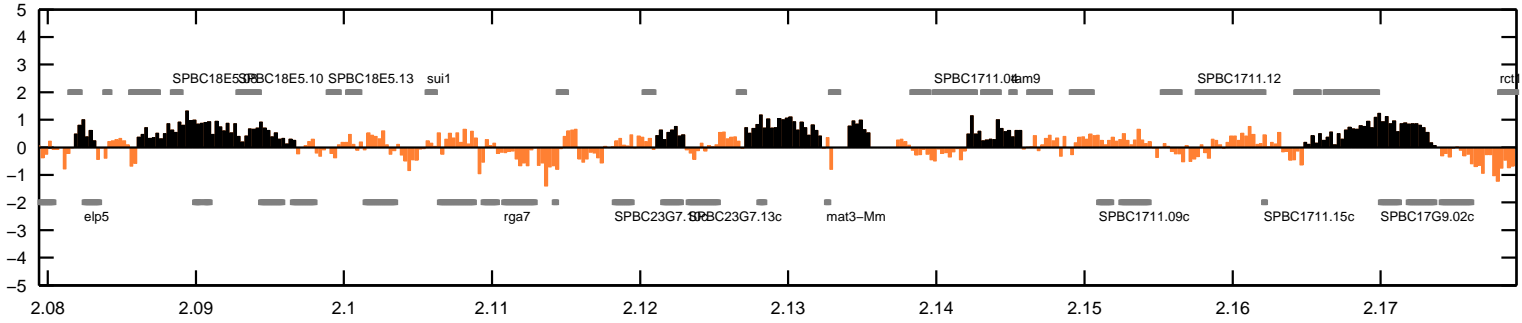

6  
x 10<sup>6</sup>

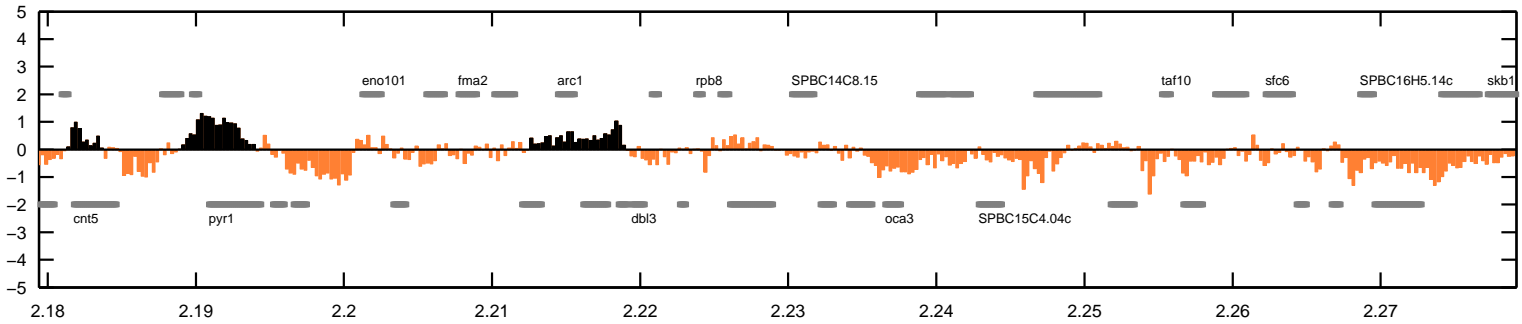

6  
x 10<sup>6</sup>

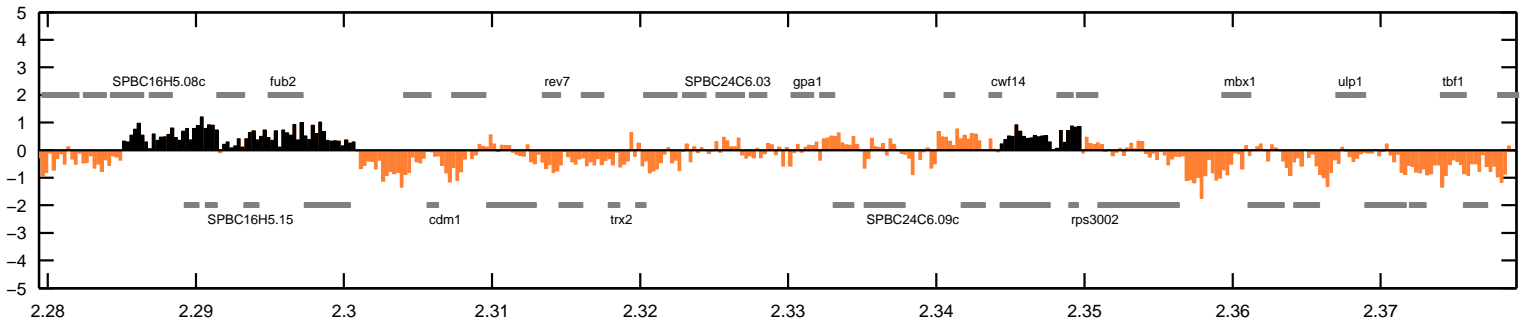

6  
x 10<sup>6</sup>

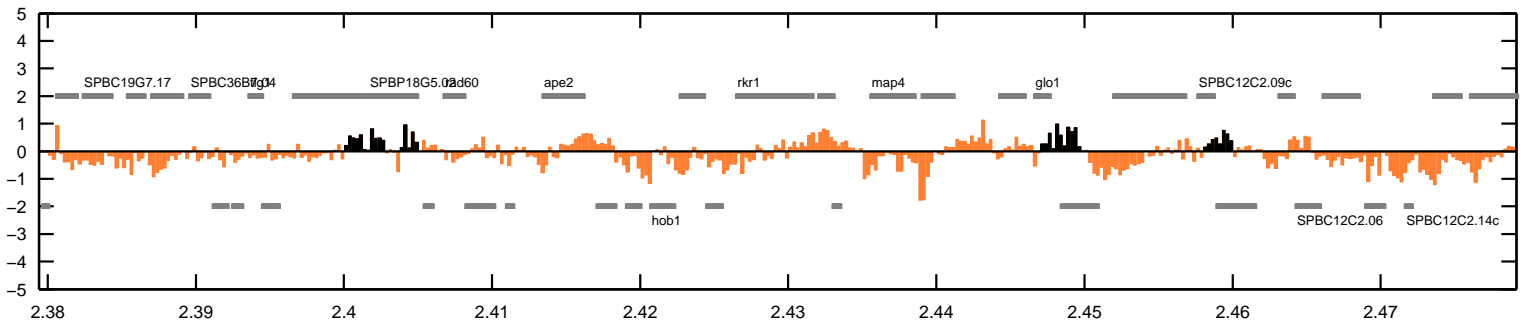

6  
x 10<sup>6</sup>

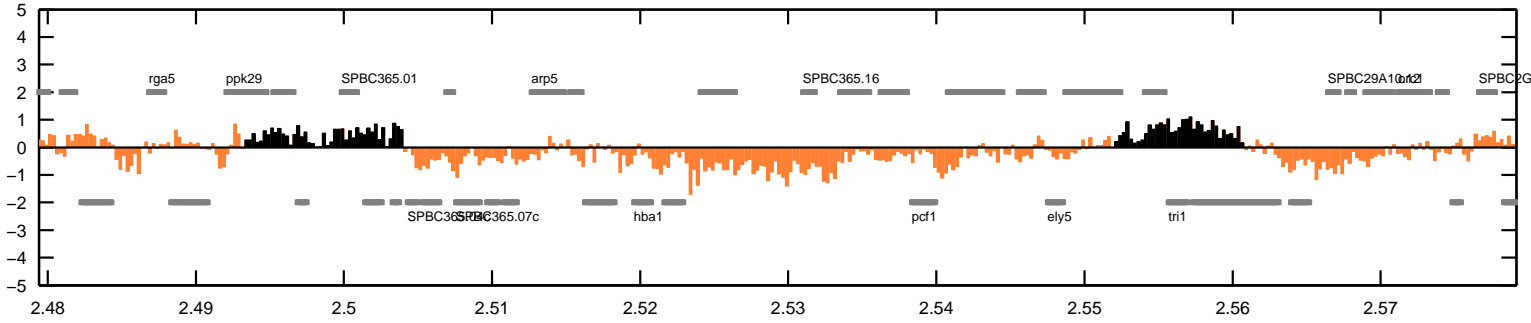

$\times 10^6$

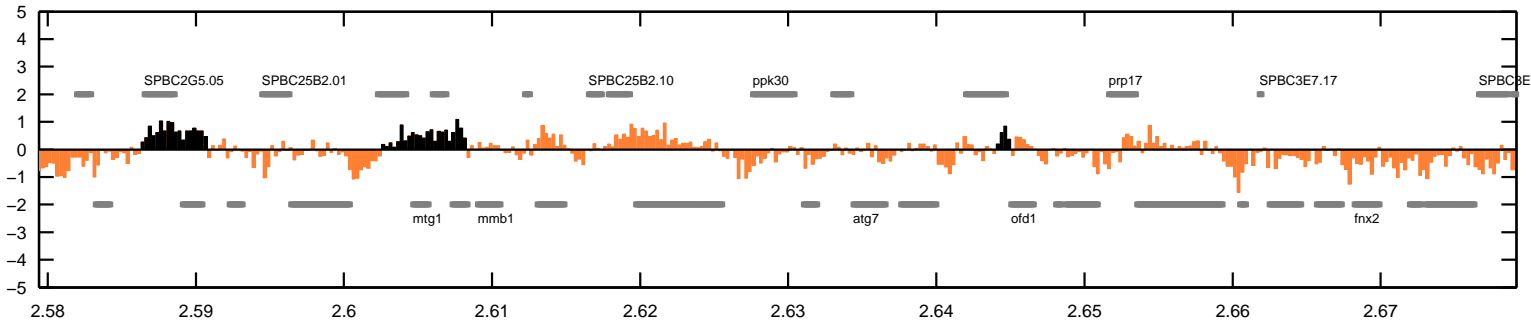

$\times 10^6$

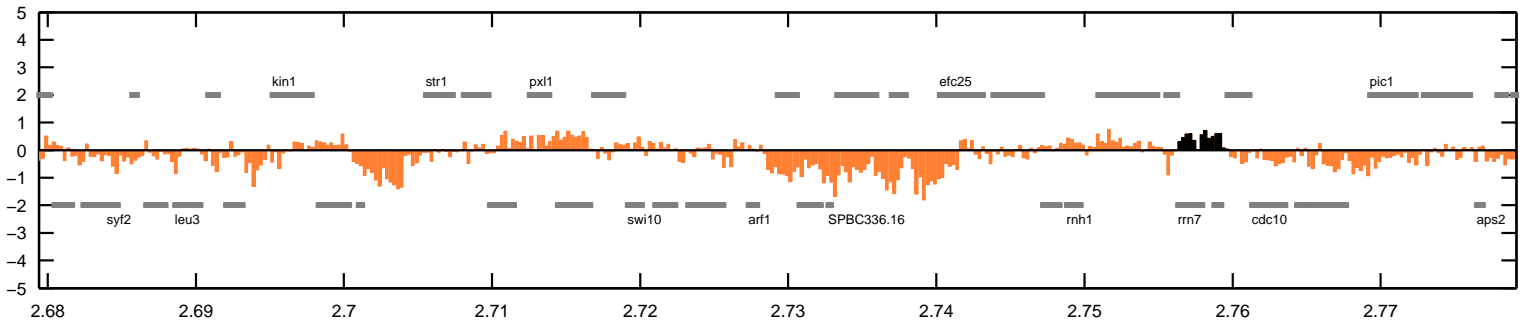

$\times 10^6$

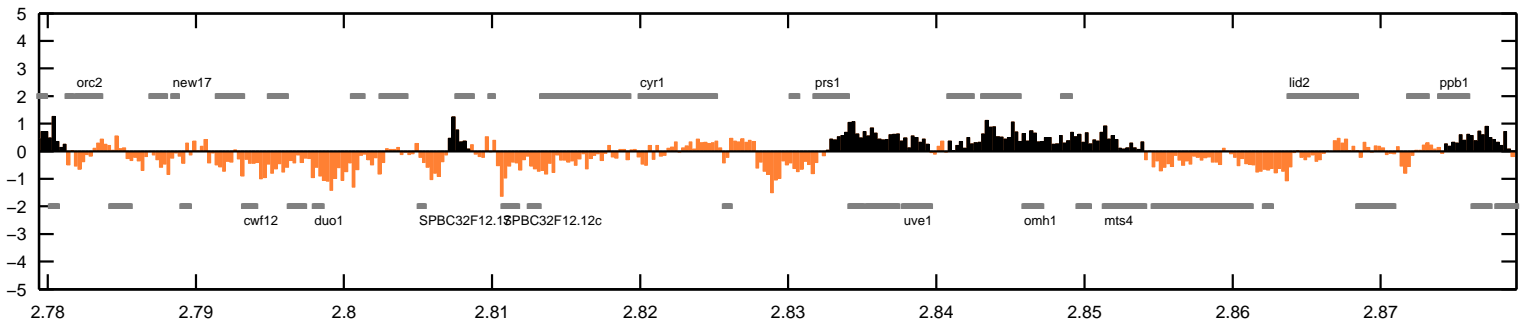

$\times 10^6$

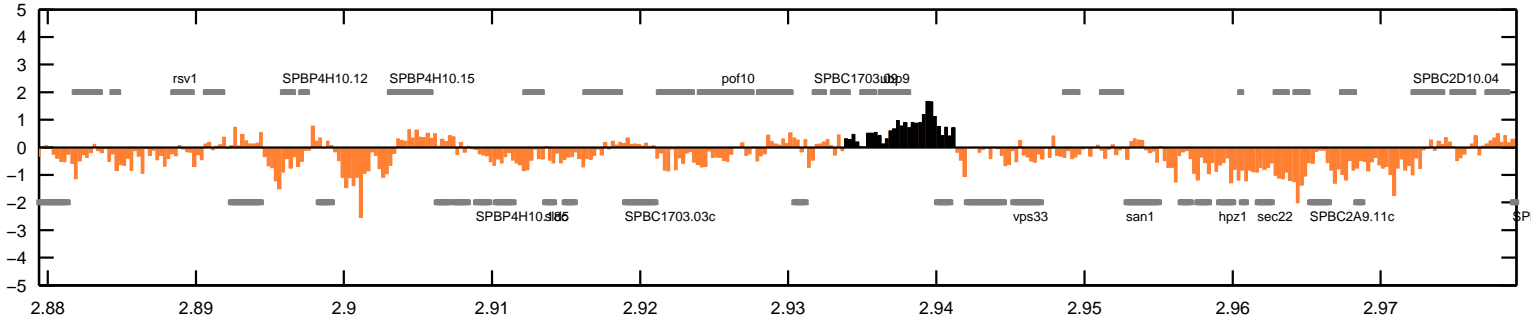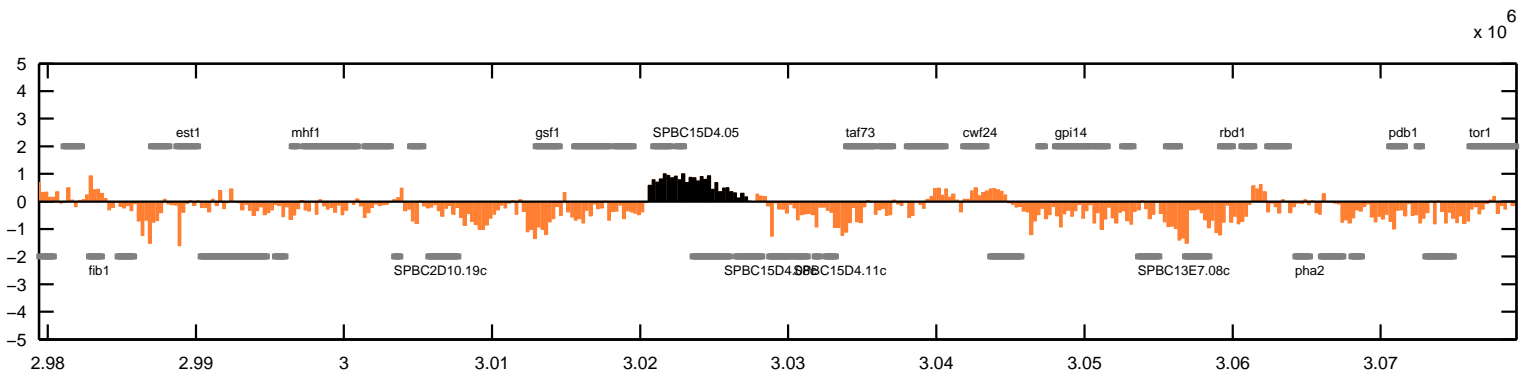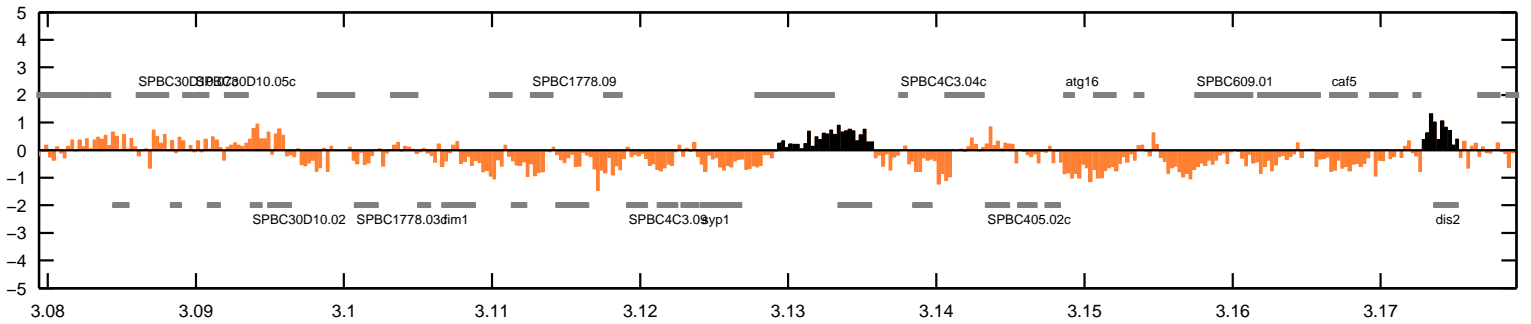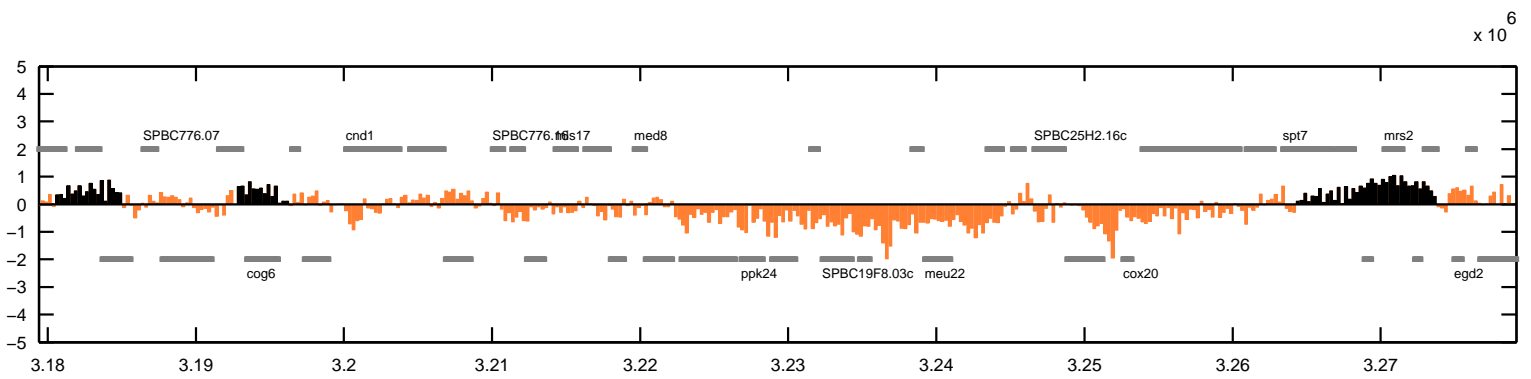



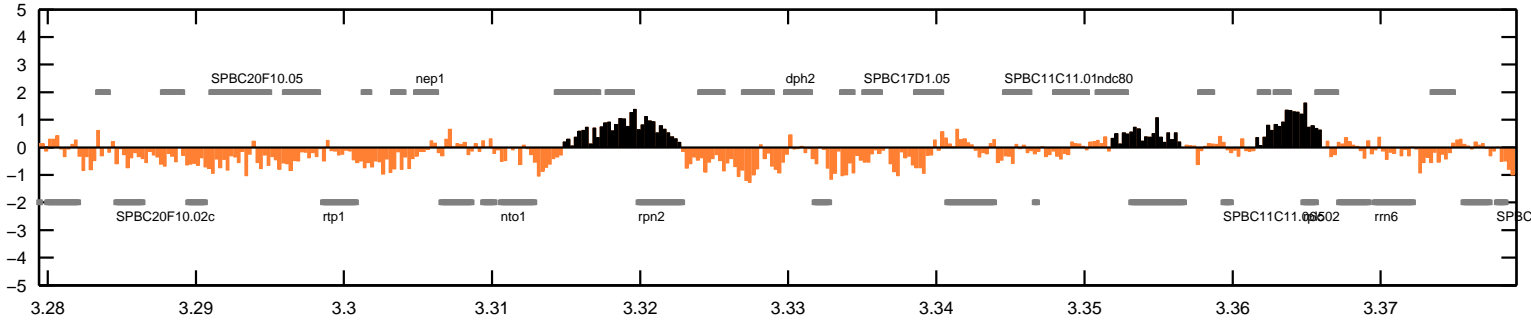

$\times 10^6$

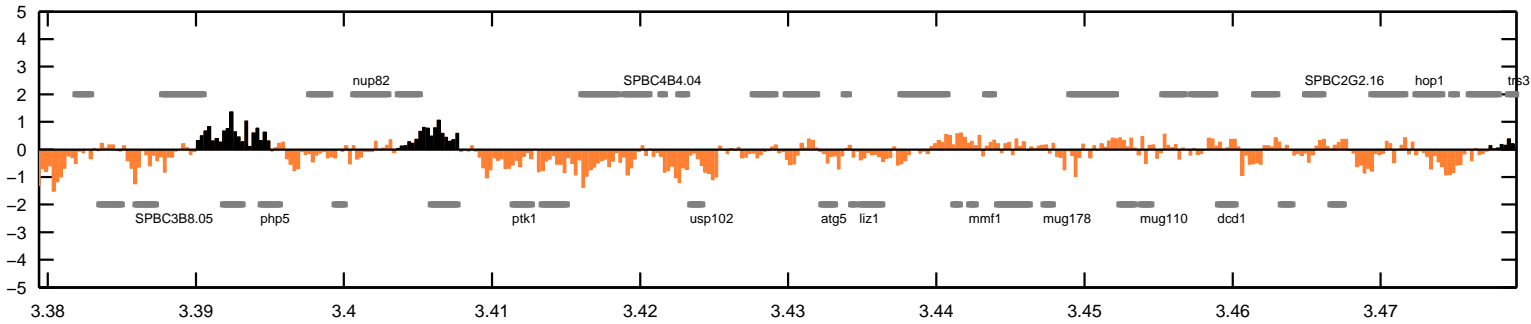

$\times 10^6$

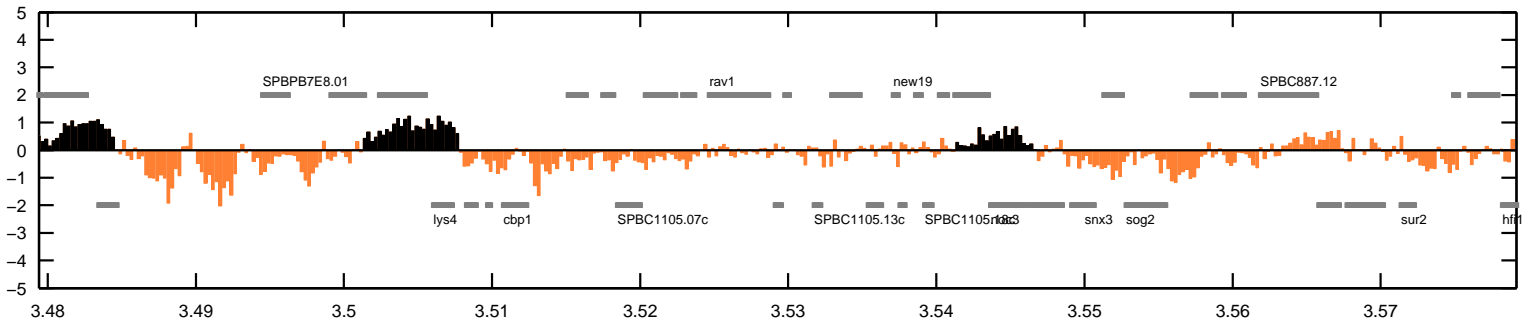

$\times 10^6$

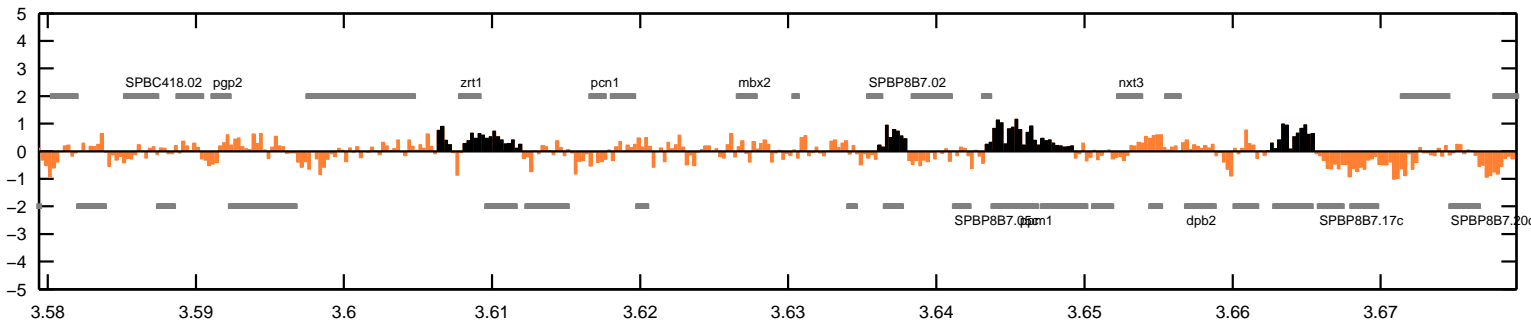

$\times 10^6$

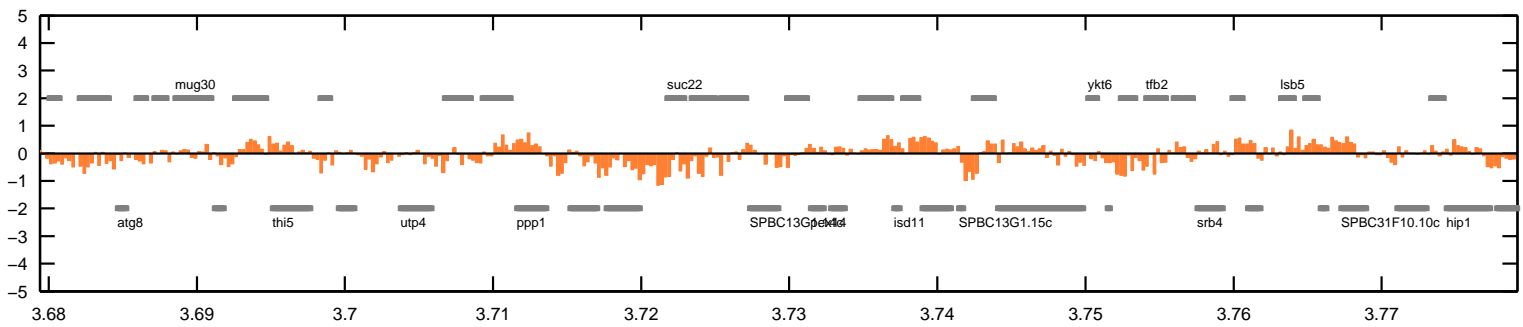

$\times 10^6$

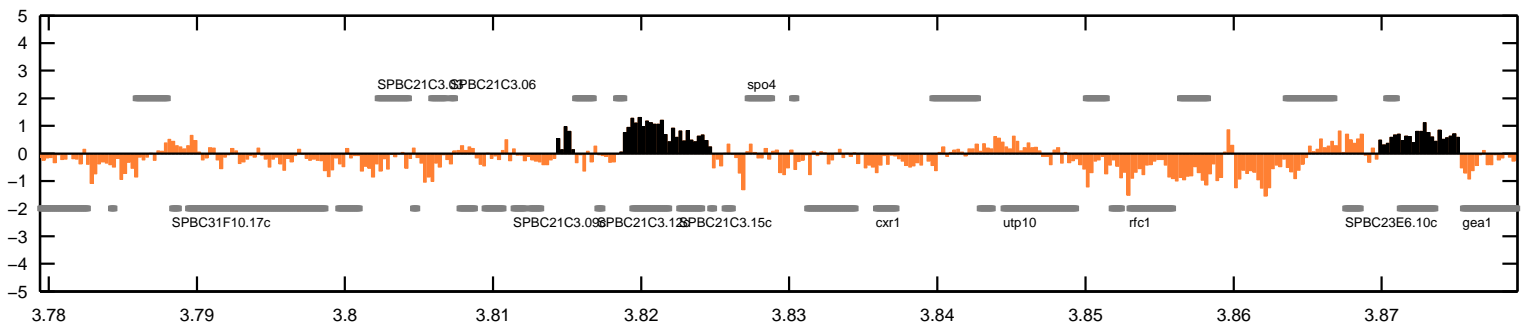

$\times 10^6$

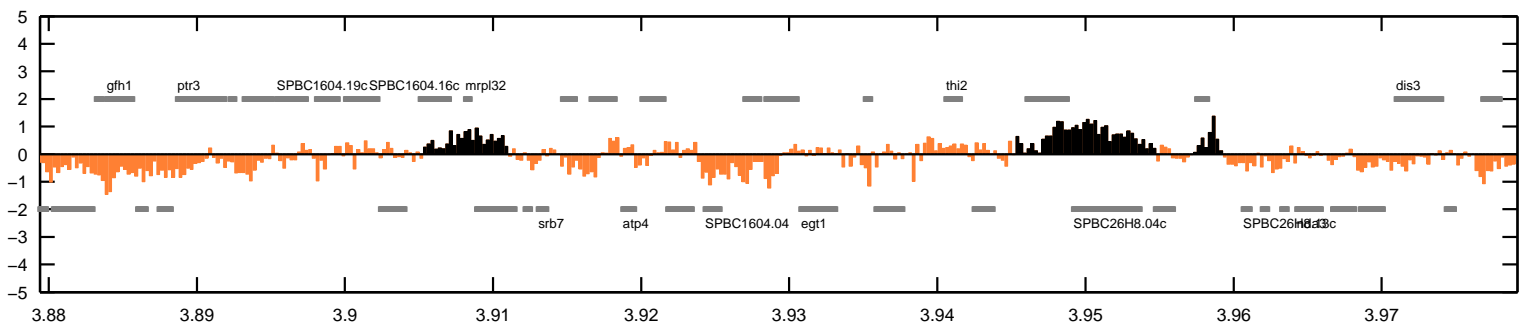

$\times 10^6$

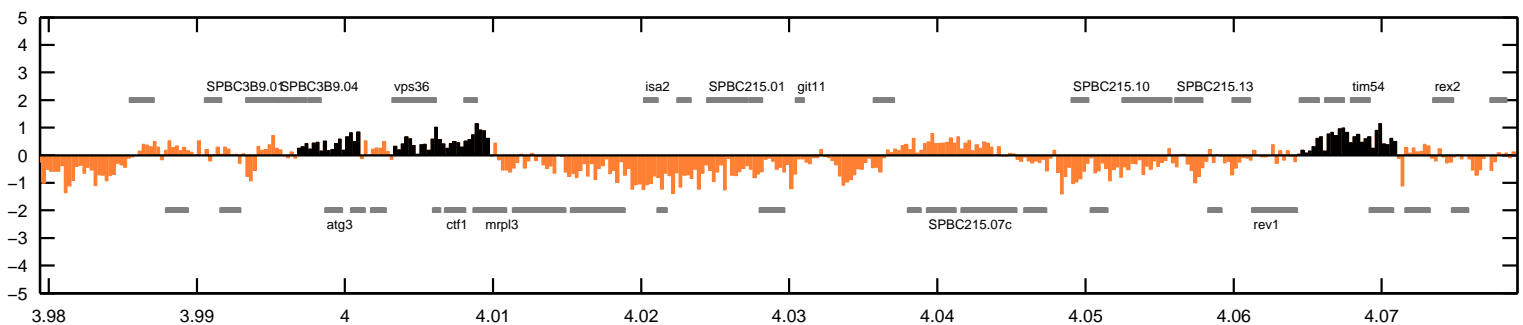

$\times 10^6$

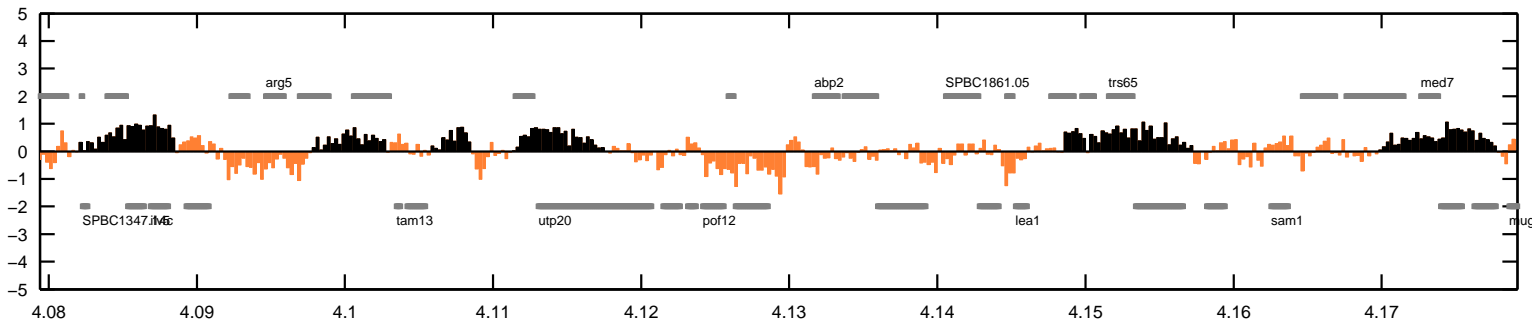

$\times 10^6$

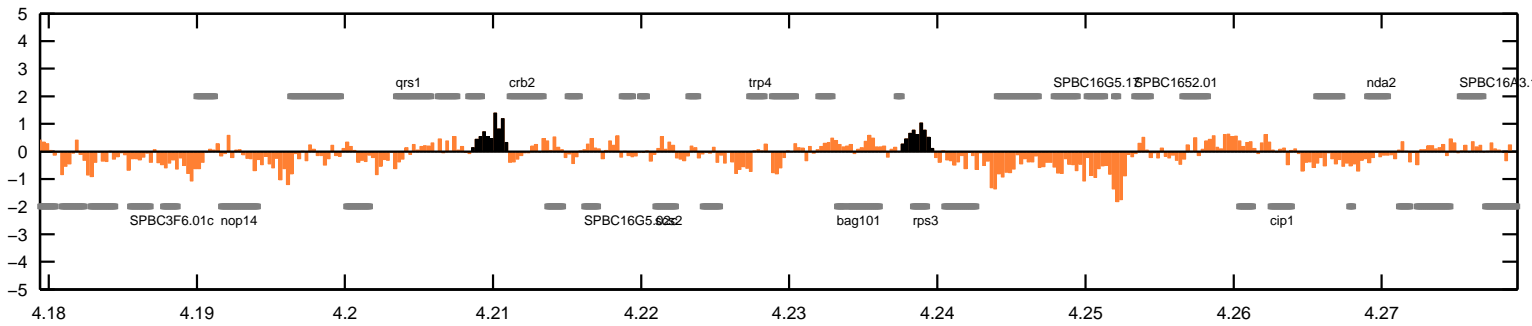

$\times 10^6$

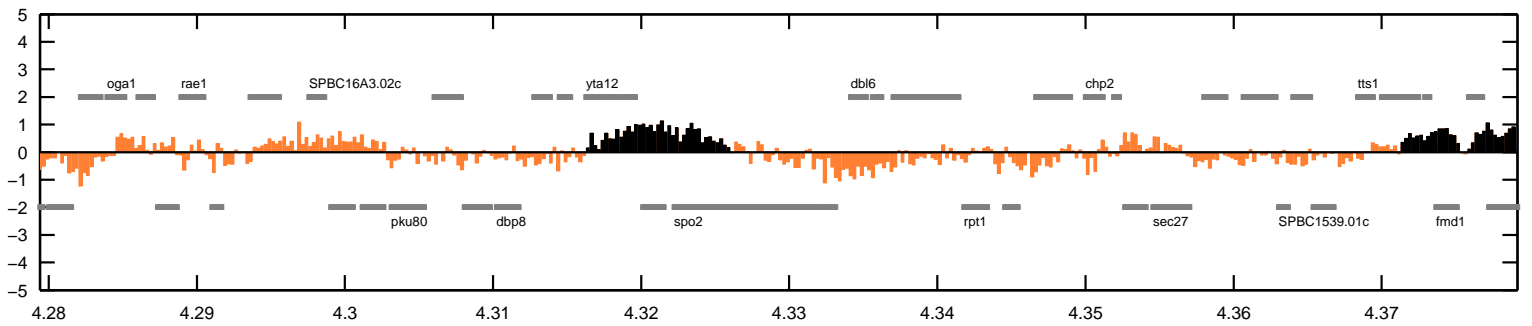

$\times 10^6$

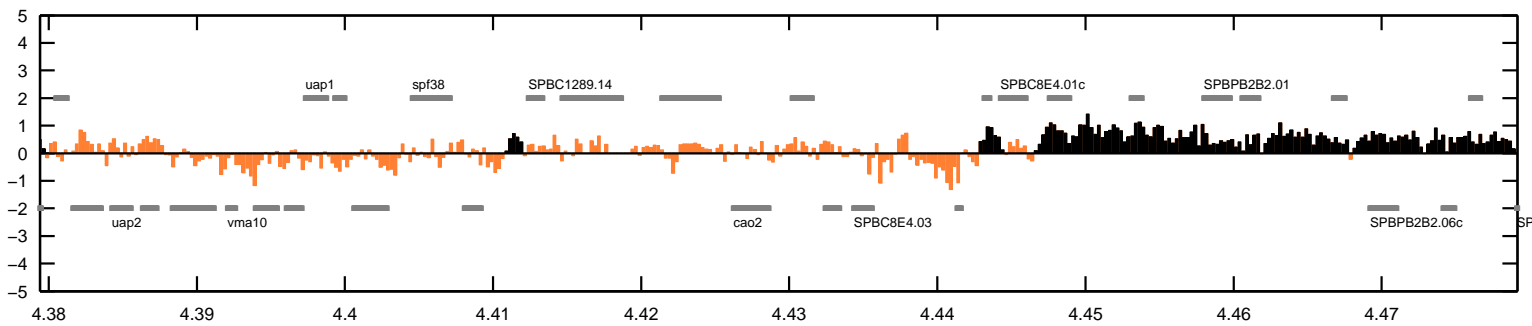

$\times 10^6$

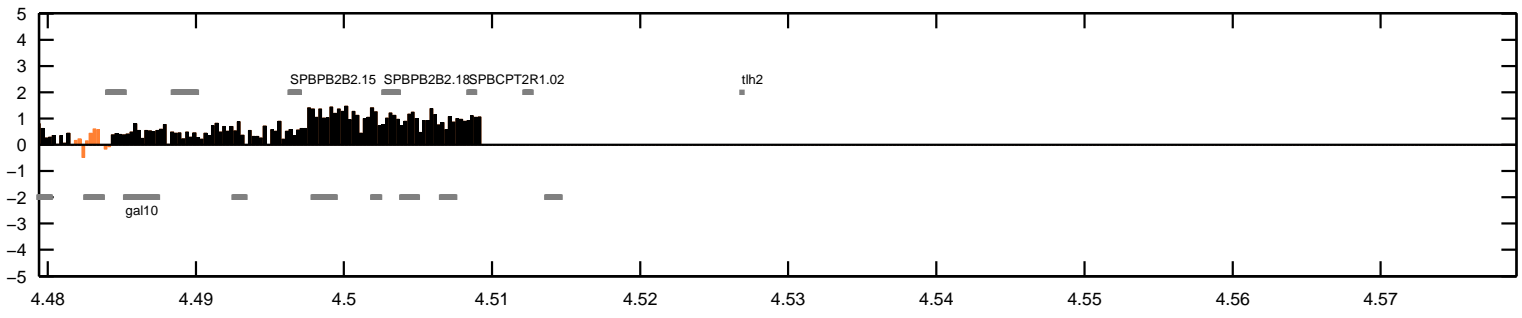

6  
x 10
